# Supplementary material for: Aqueous phase hydrogenation of furfural on Ni/TiO2 catalysts: nature of the support phase steers the product selectivity
Source: Royal Society of Chemistry journal article supplement (doi:10.1039/d3se00131h), 2023-01-01
Supplement: d3se00131h1.pdf [file d3se00131h1.pdf]

## Supplementary Information

### Aqueous Furfural Hydrogenation on Ni/TiO<sub>2</sub> Catalysts: Nature of Support Phase Steers the Product Selectivity

Anil Singh Rajpurohit,<sup>a,b</sup> Venkata Rama Mohan Talla,<sup>c</sup> Madhavan Jaccob,<sup>a\*</sup> Krishnamurthy Konda Ramaswamy<sup>b\*</sup> and Balasubramanian Viswanathan<sup>b\*</sup>

<sup>a</sup>Department of Chemistry & Loyola Institute of Frontier Energy (LIFE), Loyola College(Affiliated to University of Madras), Chennai-600034, India

<sup>b</sup>National Centre for Catalysis Research, IIT Madras, Chennai-600036, India

<sup>c</sup>Department of Chemistry, AdikaviNannaya University-Tadepalligudem Campus, Tadepalligudem -534101, India

## 26 **1. EXPERIMENTAL SECTION:**

27 **1.1. Materials.** Nickel(II) acetate tetrahydrate ( $\text{Ni}(\text{CH}_3\text{COO})_2 \cdot 4\text{H}_2\text{O}$ )-98%, from Central Drug  
28 House (P) Ltd., Furfural ( $\text{C}_5\text{H}_4\text{O}_2$ )-99% and Tetrahydrofurfuryl alcohol ( $\text{C}_5\text{H}_{10}\text{O}_2$ )-99% from  
29 Sigma Aldrich, Furfuryl alcohol ( $\text{C}_5\text{H}_6\text{O}_2$ )-98% from Avra synthesis Pvt. Ltd.,  
30 Cyclopentanone ( $\text{C}_5\text{H}_8\text{O}$ )-99% from Spectrochem Pvt. Ltd., Cyclopentanol ( $\text{C}_5\text{H}_{10}\text{O}$ )-  
31 99% from Alfa Aesar, Hydrochloric acid (HCl, 37%) from Merck Life Science Pvt. Ltd.,  
32 Titanium(IV) iso-propoxide ( $\text{C}_{12}\text{H}_{28}\text{O}_4\text{Ti}$ )-98% from Spectrochem Pvt. Ltd., Anatase  $\text{TiO}_2$   
33 (99.7% trace metals basis) from Sigma Aldrich, Hombikat UV-100~99% from Sachtleben  
34 Chemie GmbH, Anatase-rutile mixed phases  $\text{TiO}_2$  (99.9% trace metals basis) from Sigma  
35 Aldrich, Degussa P25 (AEROXIDE  $\text{TiO}_2$ , 99.5% trace metals basis) from EVONIK  
36 industries, and deionized water from Merck were used without further purification.

## 37 **1.2. Preparation of Supports.**

38 Anatase and mixed phases supports were used as received. Rutile  $\text{TiO}_2$  supports were  
39 synthesized from titanium iso-propoxide using sol-gel and hydrothermal methods as  
40 described below<sup>1,2</sup>.

41 **1.2.1. Sol-gel method.** In a typical sol-gel synthesis procedure, 42 mL of titanium iso-  
42 propoxide was hydrolyzed by the addition of 72 mL of 2 mol  $\text{L}^{-1}$  aqueous solution of  
43 hydrochloric acid under vigorous stirring. The hydrosol formed was then stirred at room  
44 temperature for 7 days. The resulting mixture was washed with water and methanol, followed  
45 by drying at 110°C in air oven for 24 h. This was then followed by calcination in air at 450°C  
46 for 4 h, at a heating rate of 2 °C/min. The obtained product is labelled as RS.

47 **1.2.2. Hydrothermal method.** The sol-gel method process is followed till the hydrolysis step  
48 of hydrothermal procedure except that the stirring was restricted to 2 h till solution became

49 clear as opposed to 7 days as in the case of sol-gel method. Then the solution was transferred  
50 to a 250 ml Teflon-lined autoclave and heated at 180 °C for 12 h (ramp rate: 5 °C/min). After  
51 cooling down to room temperature, the precipitate was collected and washed with water and  
52 then with methanol. The sample was dried at 110 °C in air oven for 24 h, followed by  
53 calcination at 450°C for 4 h(ramp rate: 2 °C/min) giving the product named as RH.

### 54 **1.3. Preparation of catalysts**

55 **1.3.1. Synthesis of catalysts.** All Ni/TiO<sub>2</sub> were prepared by wetness impregnation method. In  
56 brief, 0.64 g Ni(CH<sub>3</sub>COO)<sub>2</sub>·4H<sub>2</sub>O was dissolved in 30 mL of deionized water in a beaker.  
57 The temperature was raised to 60 °C. 2.85 g TiO<sub>2</sub> support was added under stirring and water  
58 was allowed to evaporate. The sample was further dried at 100°C for overnight. The sample  
59 was then calcined in static air at 450°C for 6 h, followed by reduction in H<sub>2</sub> flow at 450°C for  
60 6 h (ramp rate: 5 °C/min). It was cooled to room temperature in H<sub>2</sub> flow for further catalytic  
61 evaluation. The optimum nickel loading on all catalysts was 5 wt%. The prepared catalysts  
62 were designated as three letter abbreviation. For example, those catalysts prepared from  
63 anatase titania supports obtained from Aldrich and Hombikat are labelled as ATA and ATH,  
64 mixed phase titania supports obtained from Aldrich and EVONIK are labelled as ART and  
65 P25, and rutile titania supports synthesized from hydrothermal and sol-gel method are  
66 labelled as RTH and RTS, respectively.

67 **1.3.2 Synthesis of RTH catalyst by hydrazine reduction method.** 10 mL of ethanolic  
68 solution of Ni(CH<sub>3</sub>COO)<sub>2</sub>·4H<sub>2</sub>O was taken in a round flask attached with condenser. The  
69 temperature was raised to 80 °C. 5 ml 1M ethanolic NaOH solution was added under stirring,  
70 followed by 4 ml of hydrazine hydrate. 0.95 g TiO<sub>2</sub> support was added once the solution turns  
71 black. The sample was further stirred for 1h. The resultant catalyst is obtained after washing  
72 with water till pH is neutral. The nickel loading calculated from AAS shows 4.9 wt%.

#### 73 **1.4. Experimental procedure**

74 Catalytic hydrogenation was carried out in 100 mL stainless steel autoclave batch reactor  
75 (Parr Instrument Company 4565). In a typical run, the autoclave was loaded with 5.2 mmol  
76 furfural in 50 mL water, and 100 mg catalyst. Before the reaction, the reactor was flushed and  
77 pressurized with hydrogen. The reactor was heated to the desired reaction temperature and  
78 then the reaction was initiated by switching on the stirrer at 500 rpm. The reaction was  
79 quenched after desired time by cooling reactor in a water-ice bath. The reaction solution was  
80 filtered and solid catalyst was separated to analyse products on Chemito GC 1000 gas  
81 chromatograph equipped with a Agilent HP-FFAP-19091F-413 capillary column (30 m x  
82 0.32 mm) and a flame ionization detector.

#### 83 **1.5. Characterization of catalysts**

84 Powder X-ray Diffraction (PXRD) patterns of samples were recorded using Bruker AXS D8  
85 advance diffractometer at room temperature using Cu K $\alpha$  radiation source ( $\lambda = 1.5406 \text{ \AA}$ ) and  
86 scanning in the  $2\theta$  range of 10-80° with a step of 0.03°. The diffractograms were analyzed by  
87 comparing with the JCPDS-ICDD data.

88 The surface morphology of catalysts support was investigated using Hitachi S-4800 Field  
89 emission SEM. Energy Dispersive X-ray Analysis, equipped with the SEM unit was used to  
90 chemically characterize the samples. The micrographs of nanoparticles dispersed on support  
91 were observed by FEI Technai T20 TEM, operating at 200 kV.

92 N<sub>2</sub>physisorption measurements on freshly prepared catalysts were carried out using a  
93 Micromeritics ASAP 2020 instrument at 77 K. Before measurements, catalysts were  
94 degassed under vacuum at 200°C for 8 h. Surface area was measured by BET method in the

95 range of 0.04-0.22 relative pressures ( $P/P_0$ ) and pore volume and pore size distribution by  
96 BJH method.

97 The amount of Ni loaded on catalyst was measured by Shimadzu AA-7000 atomic absorption  
98 spectrometry.

99 BELCAT-II Chemisorption analyzer was used to perform both temperature programmed  
100 desorption of ammonia and temperature programmed reduction by hydrogen. In a typical  
101  $\text{NH}_3$ -TPD experiment, the reduced sample was pre-treated at 300 °C for 1 h under a He  
102 (99.9%) flow at a rate of 50 mL min<sup>-1</sup>. After pre-treatment, the sample was saturated with  
103 anhydrous ammonia (5%  $\text{NH}_3$  balance He) at 100 °C for 30 min and subsequently flushed  
104 with He at the same temperature to remove physisorbed ammonia. Then, the TPD analysis  
105 was carried out by heating the sample in He flow (30 mL min<sup>-1</sup>) upto 600 °C at a rate of 10  
106 °C min<sup>-1</sup>, and the desorbed  $\text{NH}_3$  was measured. The detector in  $\text{NH}_3$ -TPD is thermal  
107 conductivity detector (TCD). For  $\text{H}_2$ -TPR, the Ni impregnated sample calcined at 450 °C in  
108 air was taken. Prior to analysis, the sample was heated at 300 °C in high purity He gas (50  
109 mL min<sup>-1</sup>) for 1 h and then on cooling to 50 °C the gas was switched to Ar flow. After 15 min  
110 the flow was adjusted to 5 %  $\text{H}_2$  in Ar (30 mL min<sup>-1</sup>) at 50 °C and waited till baseline was  
111 stabilized. TPR of catalyst was recorded from 50 °C to 900 °C with a heating rate 10 °C min<sup>-1</sup>.  
112 X-ray photoelectron spectra (XPS) of the reduced catalysts were obtained  
113 from PHI5000VersaProbe III X-ray photoelectron spectroscopy using 1486.6 eV  
114 monochromatic Al- $K_\alpha$  radiation source. The binding energy of all catalyst atoms were  
115 calibrated with carbon 1s peak present at 284.8 eV.

## 116 **1.6. Computational details**

117 All electronic structure calculations were performed with Gaussian 16 program using density  
118 functional theory<sup>3</sup>. The geometry optimization of metal cluster and other molecules were

119 carried out using PBE functional, where metal atoms were treated with LANL2DZ basis set  
120 with effective core pseudopotential (ECP) and 6-31g\*\* basis set was employed to describe all  
121 other atoms type<sup>4,5,6</sup>. The Grimme's D3 dispersion correction was also included in  
122 calculations<sup>7</sup>. Lowest energy icosahedra Ni geometry is obtained with spin multiplicity 9 and  
123 8 for neutral and charged (-1) cluster. The Ni cluster was fixed at optimized coordinates for  
124 further catalytic studies. All calculations are done in aqueous medium using implicit solvent  
125 as conductor like polarizable continuum model (CPCM)<sup>8</sup>. The minima and transition states  
126 on potential energy surface were confirmed by the presence of all positive frequencies for  
127 minima and one negative frequency for the transition state geometry<sup>9</sup>. The transition states  
128 were connected to minima on potential energy surface by tracing intrinsic reaction  
129 coordinates<sup>10</sup>. The minima were characterized by all positive frequencies, whereas transition  
130 states exhibit one imaginary frequency. All structures were visualized using Chemcraft 1.8  
131 software<sup>11</sup>. The zero-point energy corrected adsorption energy ( $E_{ads}$ ) of a substrate on the  
132 metal cluster is given by,

$$133 \quad E_{ads} = E_{M-S} + \Delta ZPVE - E_M - E_S$$

134 Where,  $\Delta ZPVE$  stands for zero-point vibrational energy correction.  $E_S$ ,  $E_M$ , and  $E_{M-S}$  are the  
135 total energy corresponding to the substrate, metal cluster and substrate adsorbed on a metal  
136 cluster system.

## 137 REFERENCES

- 138 (1) F. Bosc, A. Ayrat, N. Keller and V. Keller, *Appl. Catal. B: Environ.*, 2007, **69**, 133-137.  
139 (2) S. Wang, J. Xu, H. Ding, S. Pan, Y. Zhang and G. Li, *CrystEngComm*, 2012, **14**, 7672–  
140 7679.  
141 (3) M. J. Frisch, G. W. Trucks and H. B. Schlegel, Gaussian 16 (Revision B.01), Gaussian  
142 Inc., Wallingford CT, 2017.  
143 (4) J. P. Perdew, K. Burke and M. Ernzerhof, *Phys. Rev. Lett.*, 1997, **78 (7)**, 1396.

- 144 (5) C. M. M. Rohlffing, P. J. Hay and R. L. Martin, *J. Chem. Phys.*, 1985, **85** (3), 1447.
- 145 (6) W. J. Hehre, K. Ditchfield and J. A. Pople, *J. Chem. Phys.*, 1972, **56**, 2257.
- 146 (7) S. Grimme, J. Antony, S. Ehrlich and H. Krieg, *J. Chem. Phys.*, 2010, **132** (15), 154104.
- 147 (8) M. Cossi, N. Rega, G. Scalmani and V. Barone, *J. Comput. Chem.*, 2003, **24** (6), 669-681.
- 148 (9) S. H. Schlegel, *J. Comput. Chem.*, 1982, **3**, 214–218.
- 149 (10) K. Fukui, *Acc. Chem. Res.*, 1981, **14**, 363-368.
- 150 (11) G. A. Zhurko and D. A. Zhurko, Chemcraft-Graphical Program for Visualization of  
151 Quantum Chemistry Computations, Version 1.8, <https://chemcraftprog.com>.

152

153

154

155

156

157

158

159

160

161

162

163

164

165

166

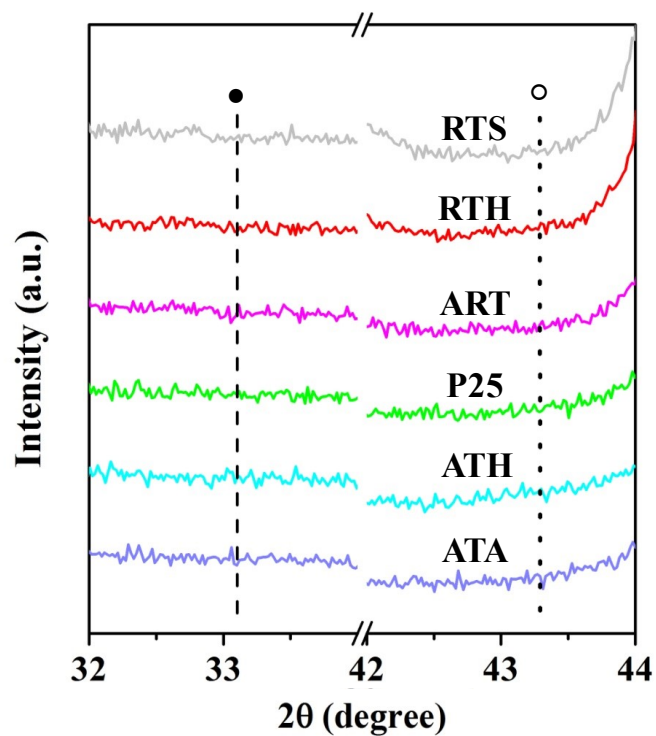

167

168 **Figure S1.** XRD pattern Ni/TiO<sub>2</sub> catalysts: (a) ATA, (b) ATH, (c) P25, (d) ART, (e) RTH,  
 169 and (f) RTS showing (●) NiTiO<sub>3</sub> (104) and (○) NiO (200) region. (JCPDS No. for NiTiO<sub>3</sub>  
 170 and NiO is 33-0960 and 47-1049, respectively)



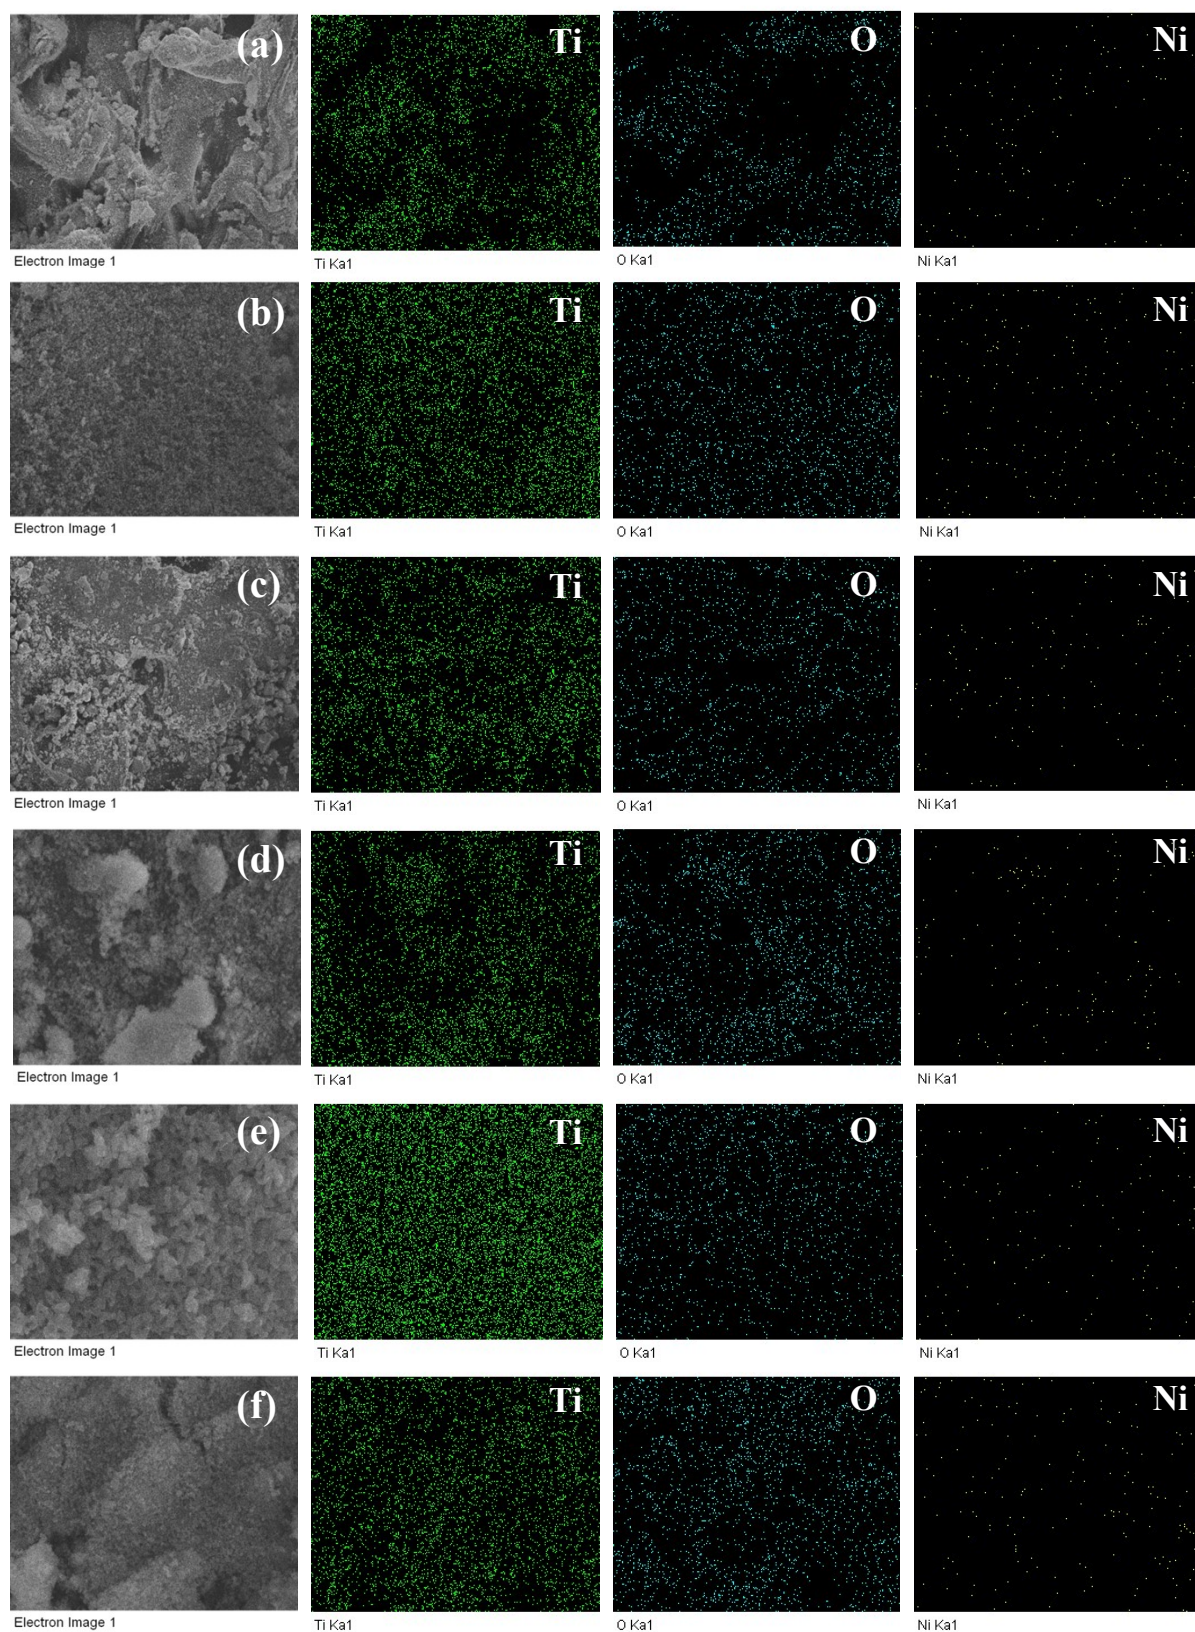

171

172 **Figure S2.** SEM images with EDX elemental mapping of Ni/TiO<sub>2</sub> catalysts: (a) ATA, (b)  
 173 ATH, (c) P25, (d) ART, (e) RTH, and (f) RTS.

174

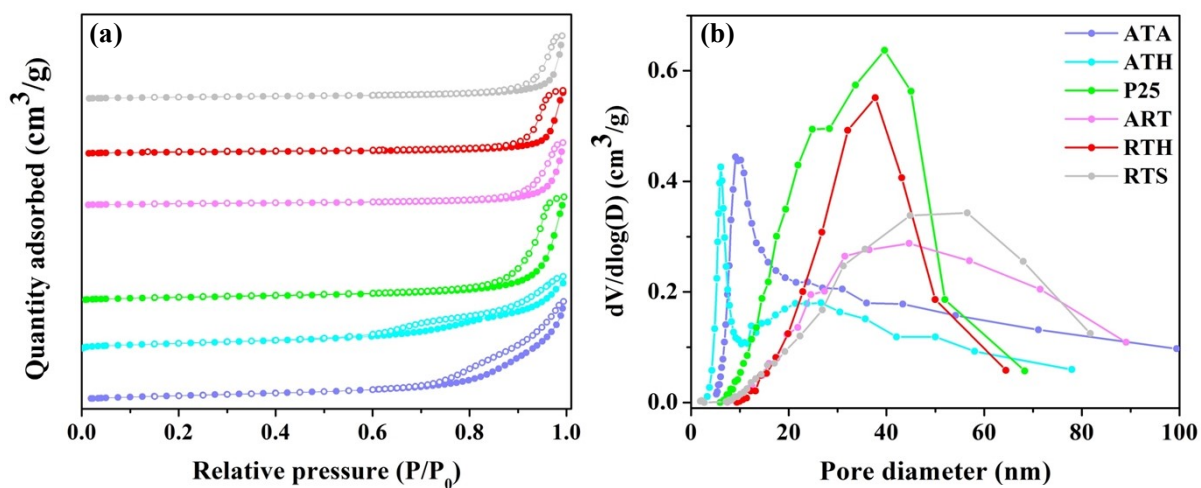

175

176 **Figure S3.** Nitrogen sorption isotherms and BJH pore size distribution of Ni catalysts. The

177 adsorption and desorption in isotherm are represented as closed and open circles respectively.

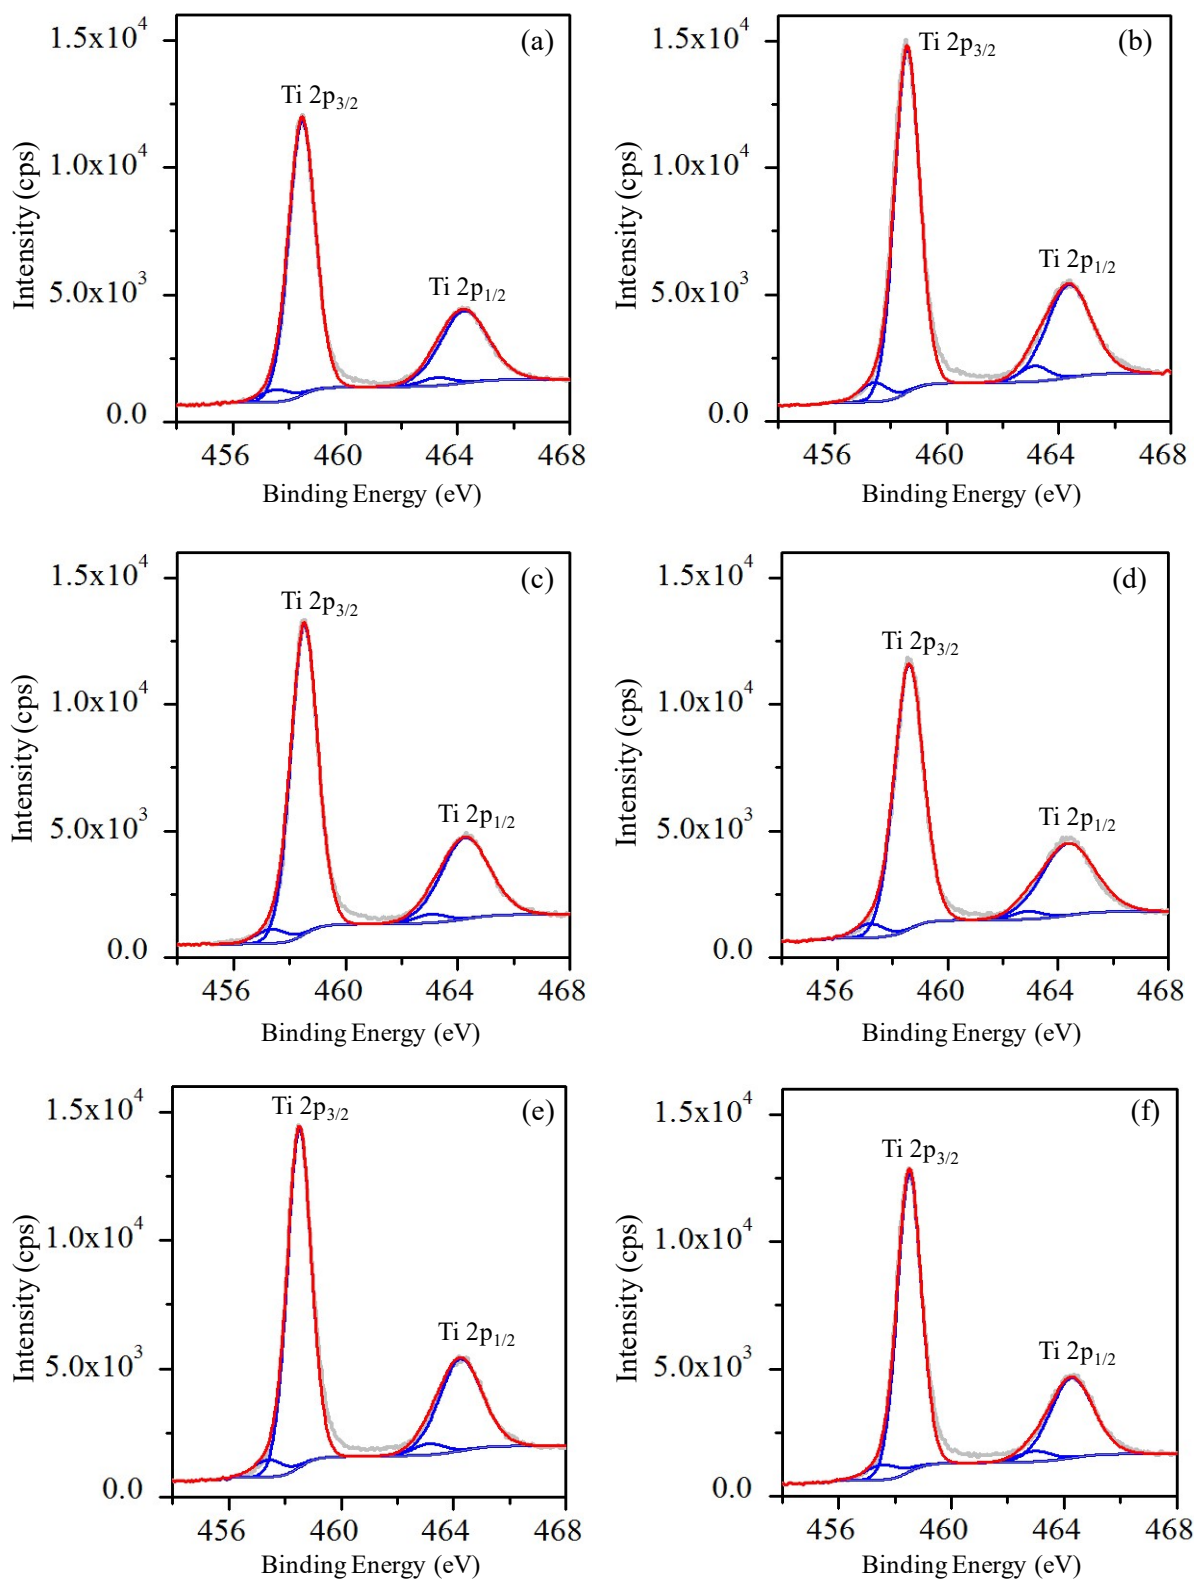

178  
179

180 **Figure S4.** Ti 2p core level XP spectra for the Ni catalysts supported on (a) ATA, (b) ATH,  
181 (c) P25, (d) ART, (e) RTH and, (f) RTS.



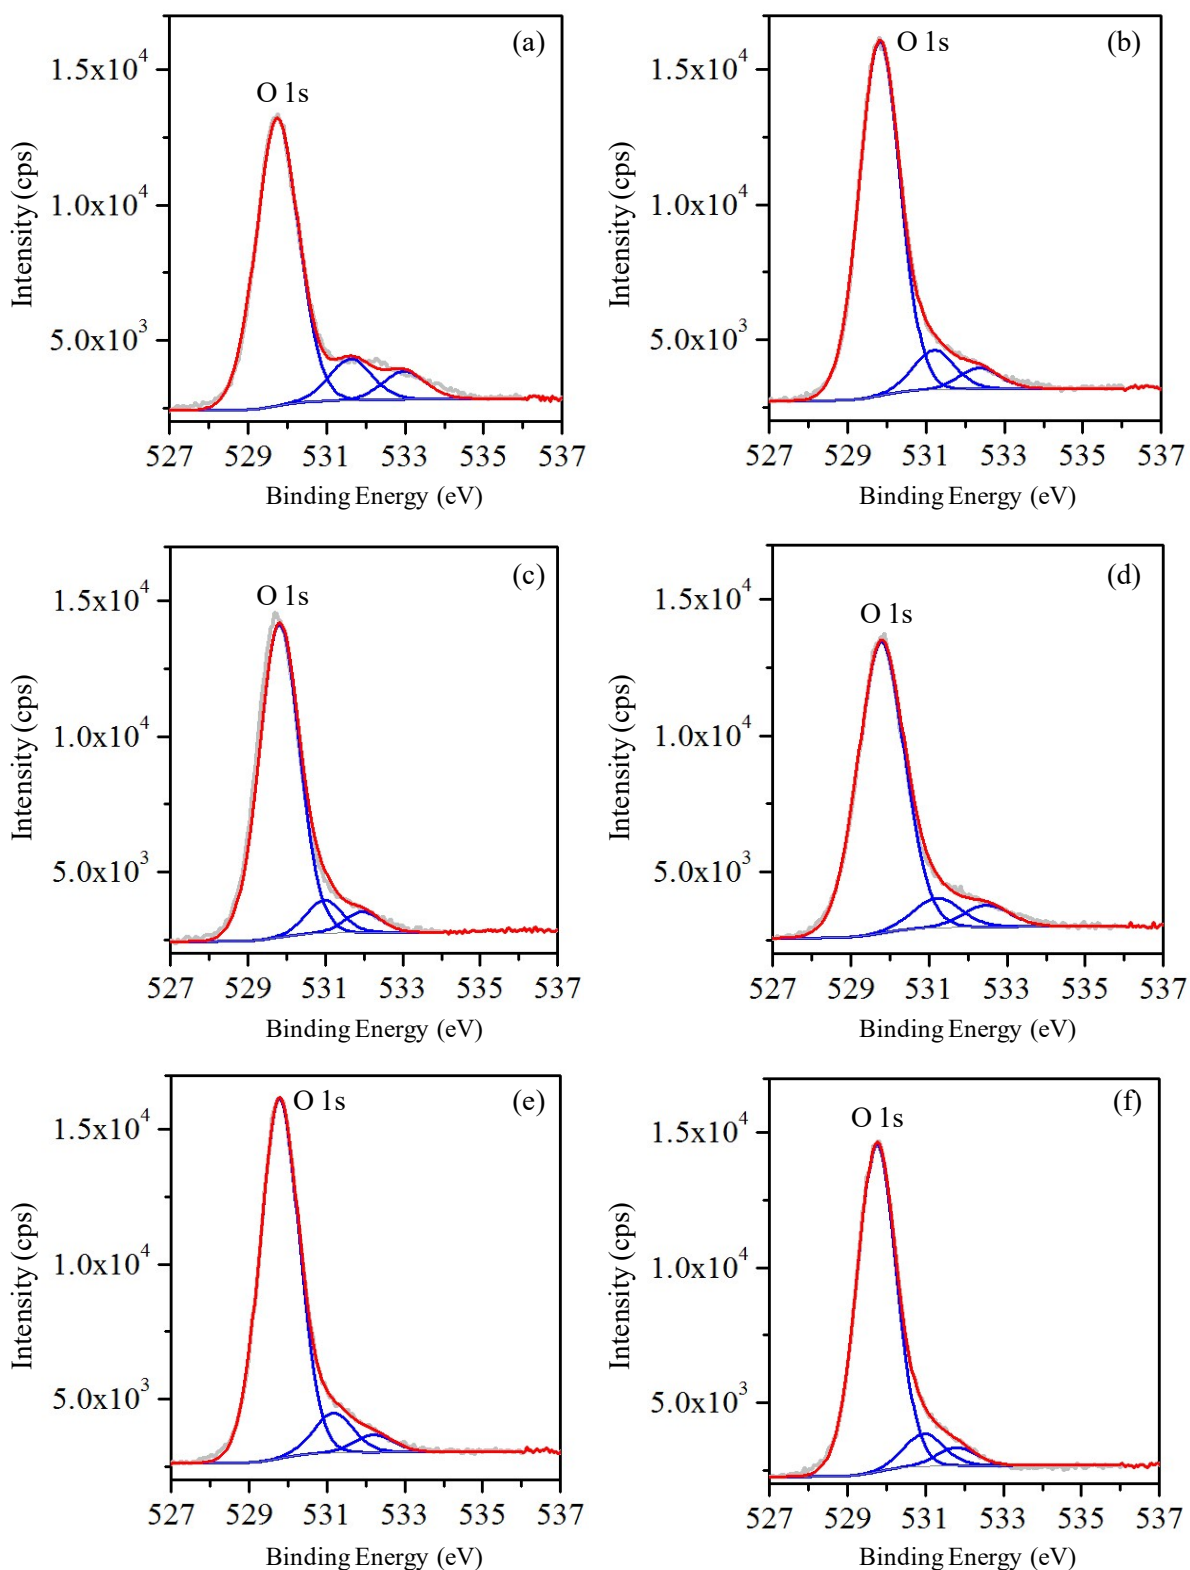

182

183 **Figure S5.** O 1s core level XP spectra for the Ni catalysts supported on (a) ATA, (b) ATH,

184 (c) P25, (d) ART, (e) RTH and, (f) RTS.

185

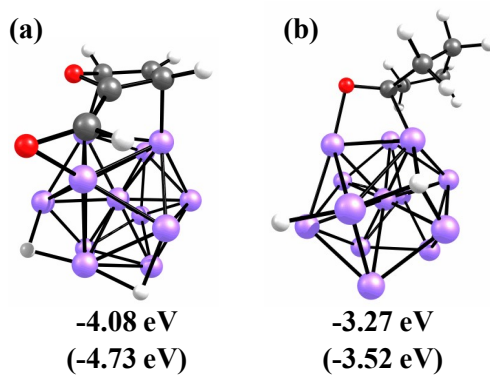

186

187 **Figure S6.** Co-adsorption of (a) FAL + 2H and, (b) CPO + 2H on Ni cluster. The adsorption  
188 energy on neutral Ni cluster is given below, where values in parentheses are for adsorption  
189 over charged (-1) cluster.

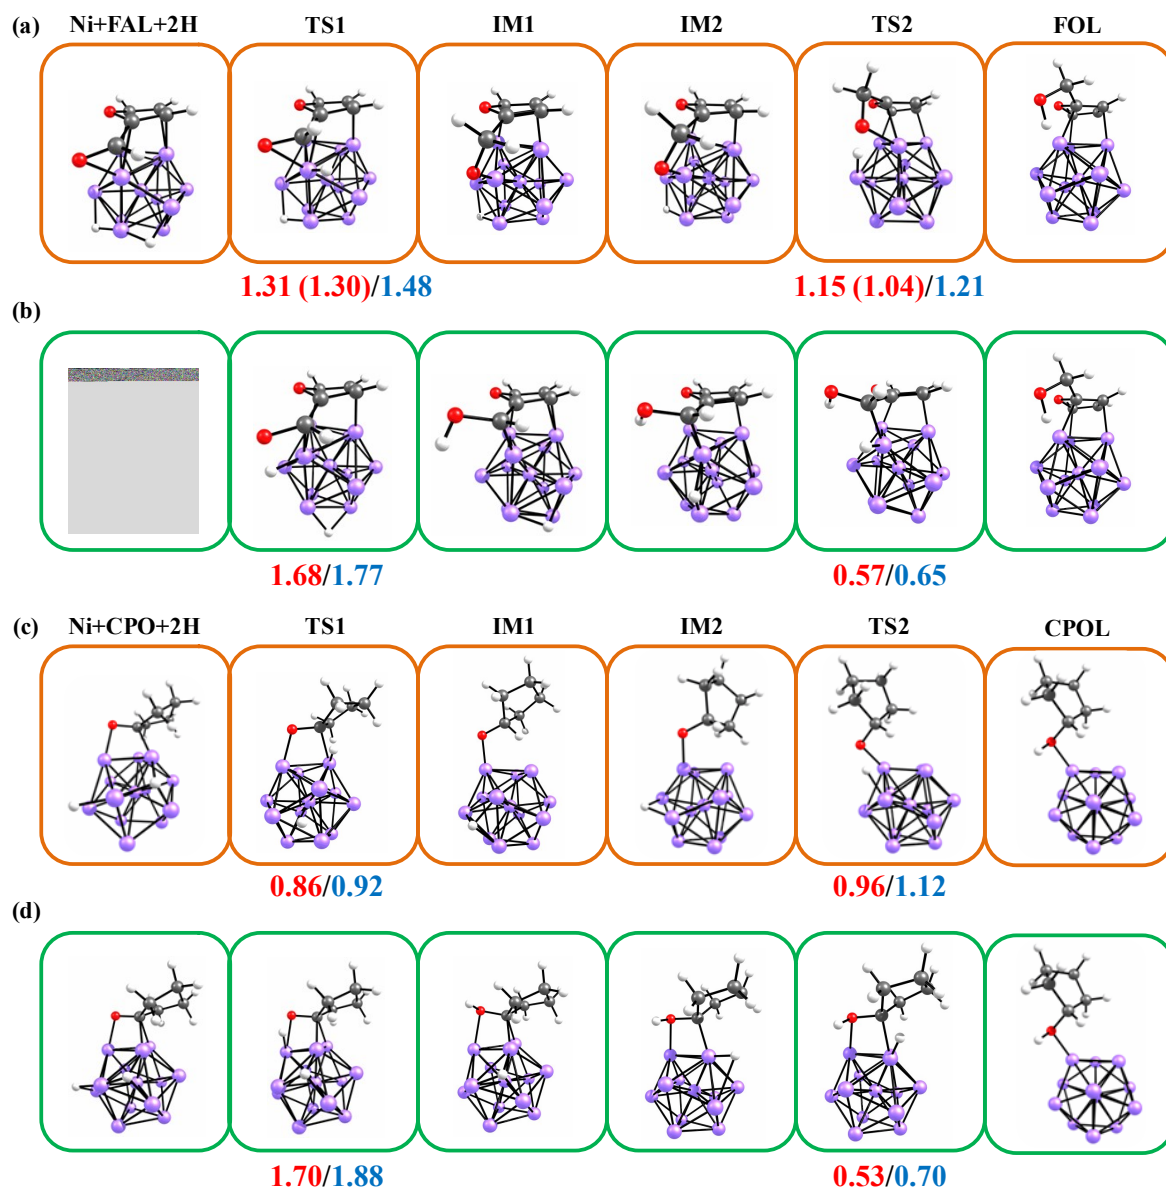

190

191 **Figure S7.** Initial, transition, intermediate and final state geometry during hydrogenation of  
 192 (a and b) FAL to FOL and (c and d) CPO to CPOL over Ni cluster. Colour code: Figures in  
 193 brown box (a and c) are corresponding to path a (addition of hydrogen first to carbon and  
 194 then second hydrogen to oxygen of the carbonyl group). Figures in green box (b and d) are  
 195 corresponding to path b (addition of hydrogen first to oxygen and then second hydrogen to  
 196 carbon of the carbonyl group). Values in red and blue represent free energy barriers for  
 197 reaction over neutral and charged (-1 electronic charge) Ni clusters, respectively. The values

198 in bracket (a) shows energy barrier for furfural hydrogenation along path a over relaxed  
199 neutral cluster. All values are in eV.

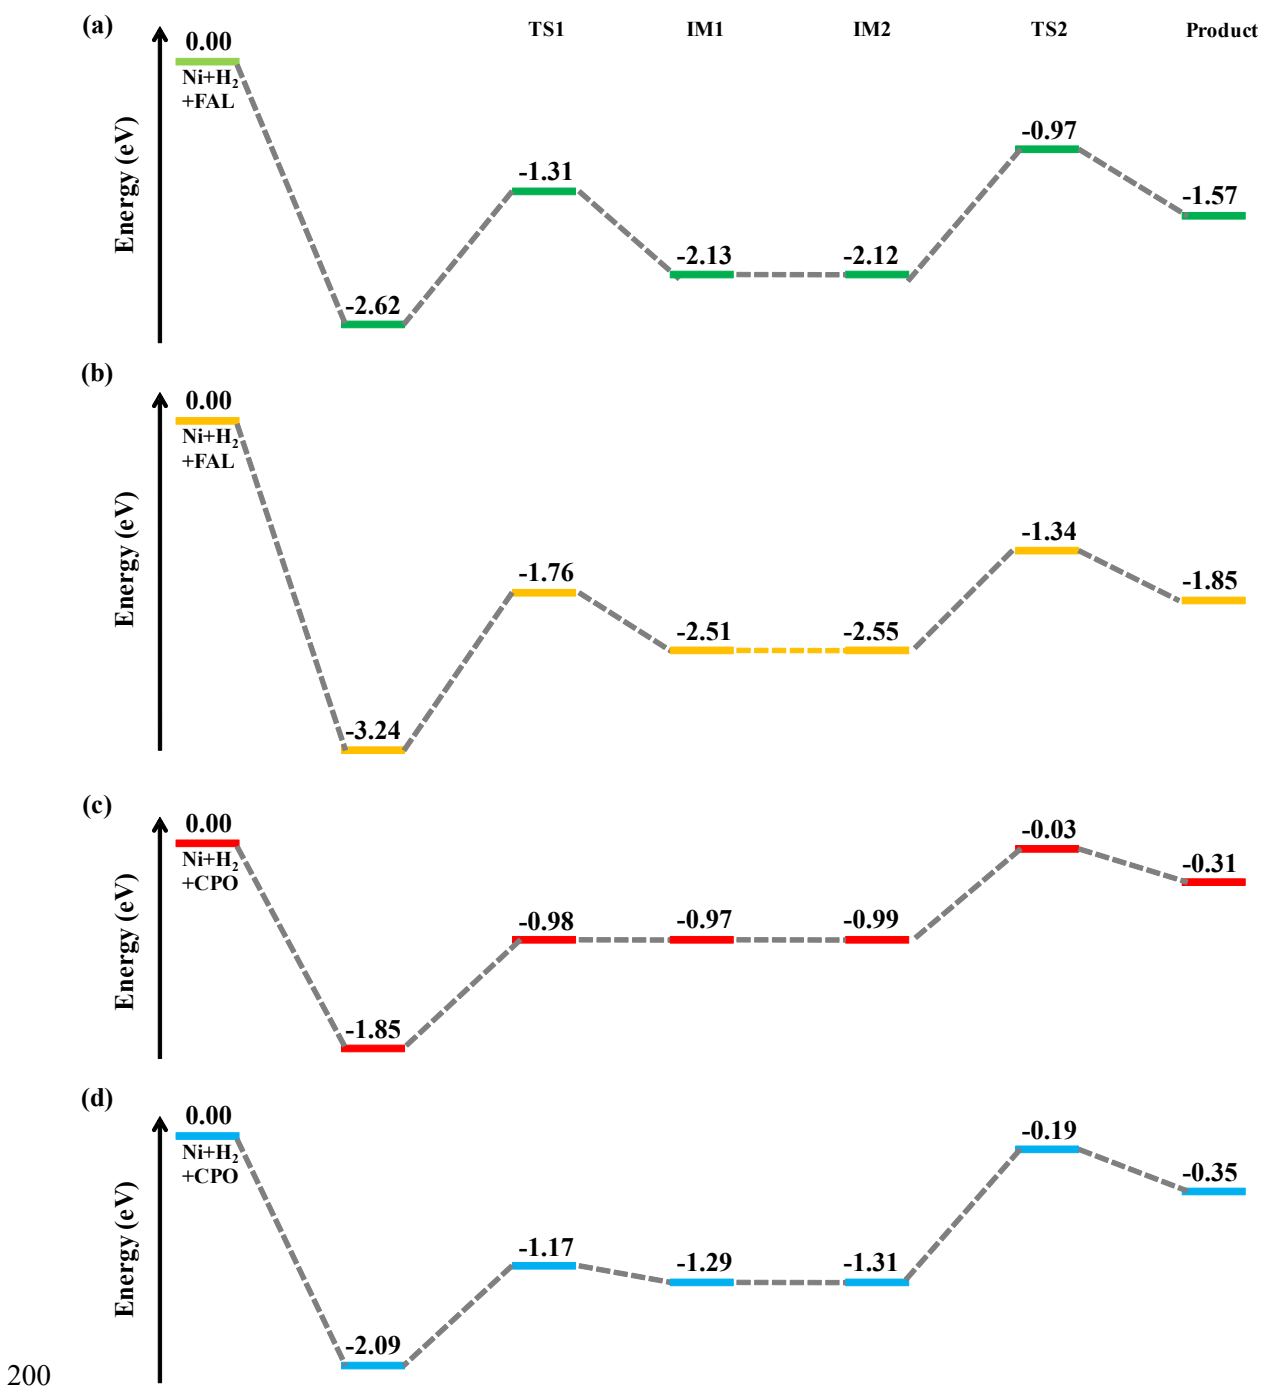

201 **Figure S8.** Free energy profile for furfural and cyclopentanone hydrogenation over (a and c)  
202 neutral and (b and d) charged Ni clusters along path a, respectively. The values are in eV.

203

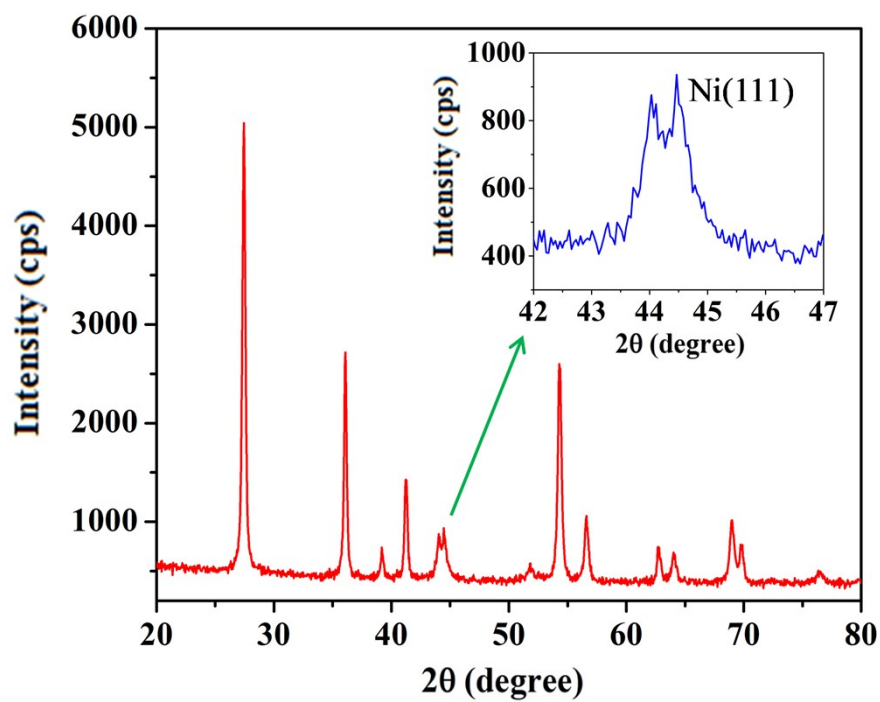

204

205 **Figure S9.** XRD pattern of RH support loaded with 10 wt% Ni content. The enlarged region

206 shows overlapped Rutile and Ni peak.

207

208

209

210



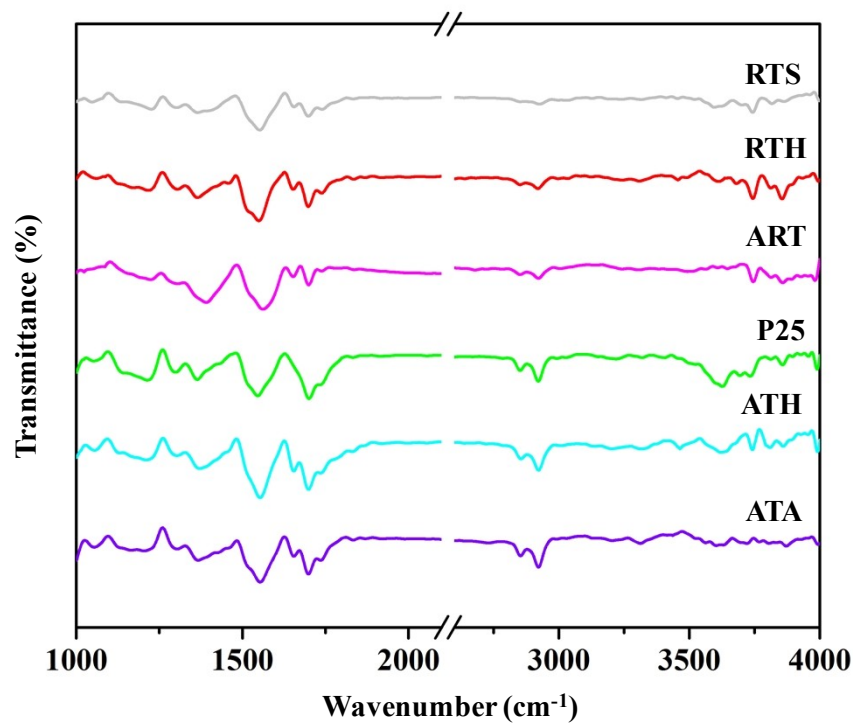

211

212 **Figure S10.** FTIR spectra of dried Ni catalysts after reaction at 140°C.

213

214

215

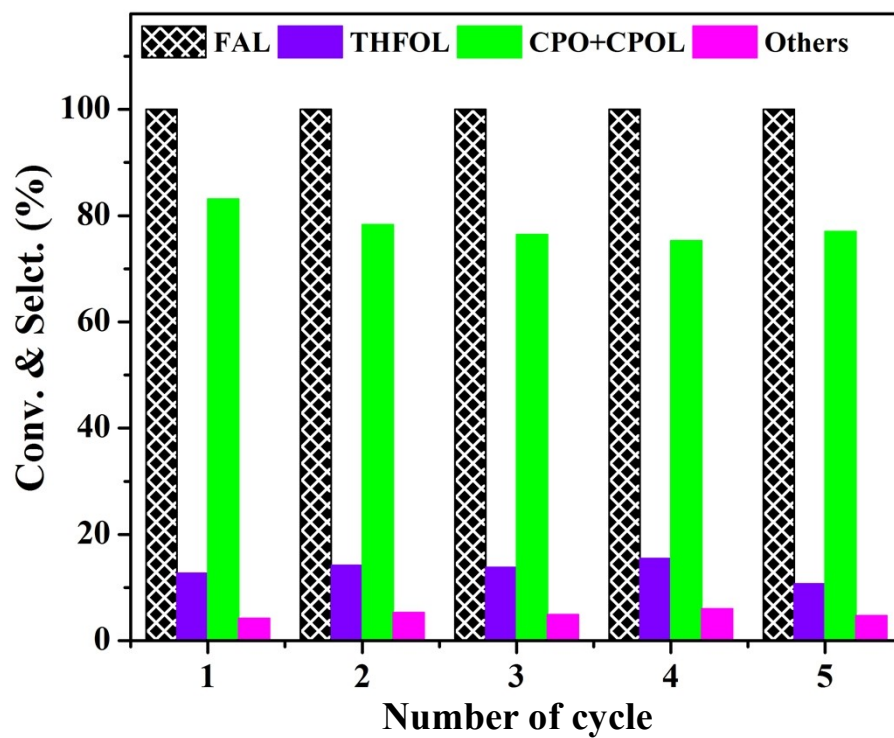

216

217 **Figure S11.** Recycling test over RTH catalyst. Reaction conditions: 5.2 mmol furfural, 50

218 mL water, 50 bar H<sub>2</sub>, 140°C, 4h, 500 rpm.

219

220

221

222

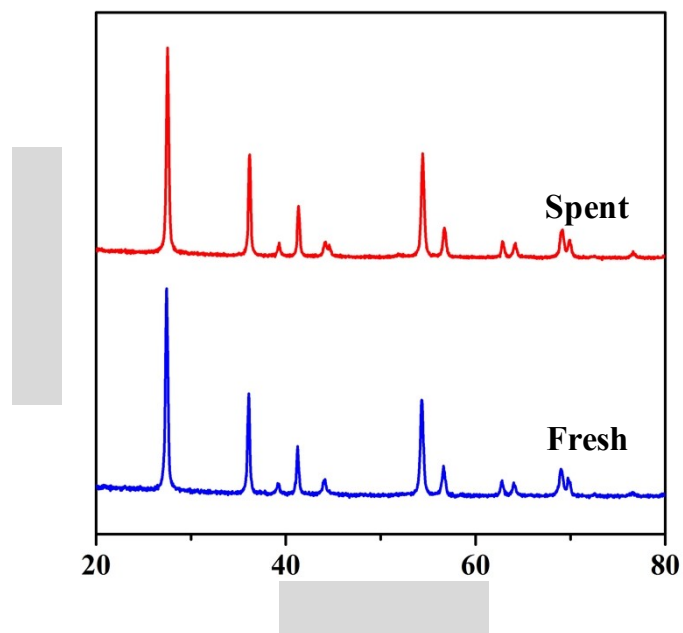

223

224 **Figure S12.** XRD pattern of fresh and spent (after 5 recycles) RTH catalyst.

225

226

227

228

229

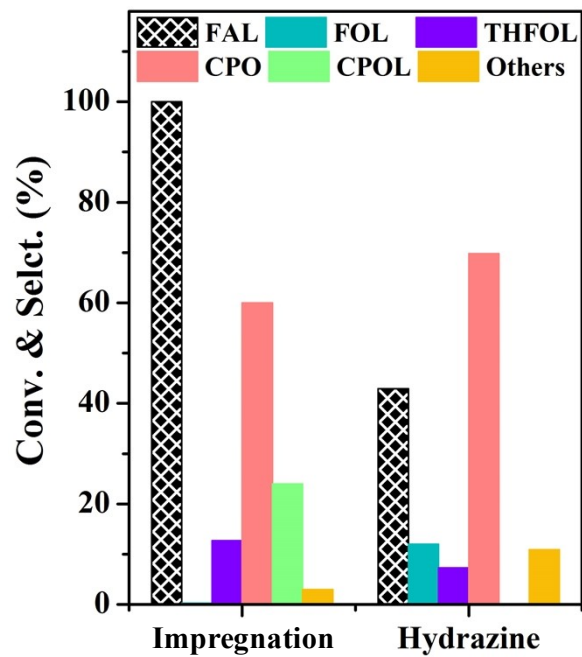

230

231 **Figure S13.** Furfural hydrogenation over RTH catalysts prepared from impregnation method

232 and hydrazine reduction method. Reaction conditions: 5.2 mmol furfural, 50 mL water, 50

233 bar H<sub>2</sub>, 140°C, 4h, 500 rpm.

234

235

236

237

238

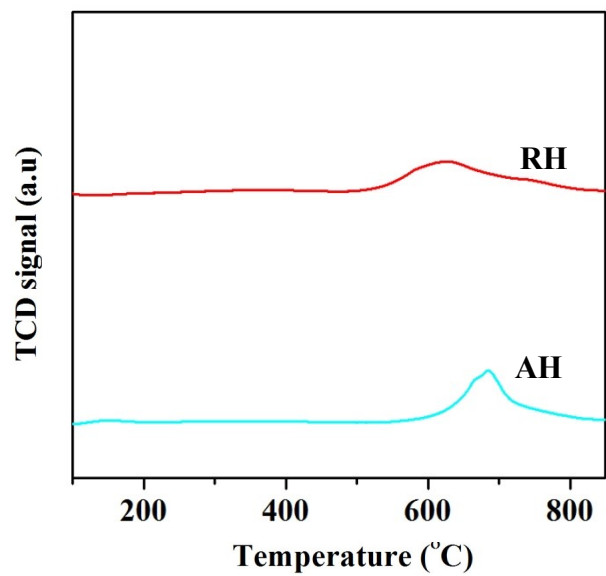

239

240 **Figure S14.** H<sub>2</sub>-TPR profiles of bare anatase (AH) and rutile (RH) titania supports of ATH  
241 and RTH catalysts, respectively.

242

243

244

245

246

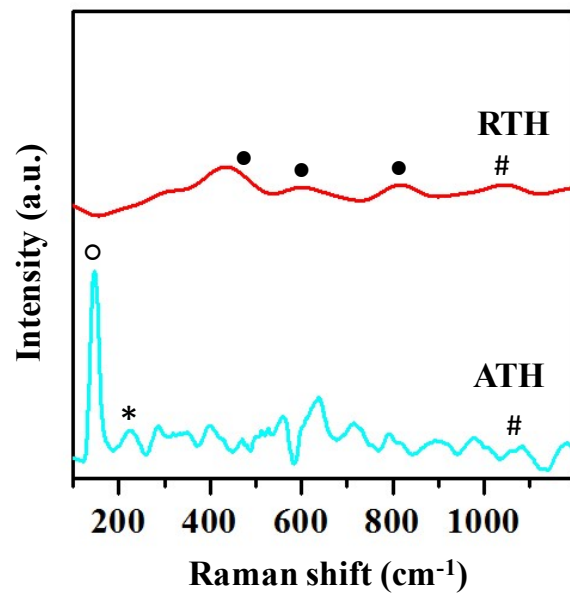

247

248 **Figure S15.** Raman spectra of ATH and RTH catalysts showing presence of (○) anatase  
249 phase, (•) rutile phase, (\*) NiTiO<sub>3</sub> and (#) NiO.

250

251

252

253

254

255

256

257

258

259

260

261

262

263

264

265

266

267 **Table S1.** Physico-chemical properties of catalysts support

| Catalyst   | A:R (%) <sup>a</sup> | D (nm) <sup>b</sup> | S <sub>BET</sub> (m <sup>2</sup> /g) | V <sub>p</sub> (cm <sup>3</sup> /g) <sup>c</sup> | D <sub>p</sub> (nm) <sup>c</sup> |
|------------|----------------------|---------------------|--------------------------------------|--------------------------------------------------|----------------------------------|
| <b>ATA</b> | 100:0                | 19.4/-              | 62                                   | 0.28                                             | 16.1                             |
| <b>ATH</b> | 100:0                | 15.9/-              | 66                                   | 0.21                                             | 11.1                             |
| <b>P25</b> | 77:23                | 23.1/31.8           | 40                                   | 0.29                                             | 26.0                             |
| <b>ART</b> | 48:52                | 47.7/54.4           | 23                                   | 0.17                                             | 34.6                             |
| <b>RTH</b> | 0:100                | -/29.9              | 22                                   | 0.17                                             | 31.4                             |
| <b>RTS</b> | 0:100                | -/22.5              | 23                                   | 0.17                                             | 33.8                             |

268 <sup>a</sup>Percentage of anatase:rutile phases calculated using (101) and (110) XRD peaks intensities;<sup>b</sup>crystallite size of (101) and  
269 (110) plane of anatase and rutile phase calculated using Scherrer equation;<sup>c</sup>pore volume and diameter obtained from BJH  
270 analysis

271

272

273

274

275

276

277

278

279

280

281

282

283

284

285

286

287

288

289

290

291

292

293 **Table S2.** Desorption temperature (°C) of NH<sub>3</sub> from titania catalysts based on their  
294 desorption strength

| <b>Catalyst</b> | <b>Weak</b> | <b>Medium</b> | <b>Strong</b> |
|-----------------|-------------|---------------|---------------|
| <b>ATA</b>      | 190         | 328           | 403,463       |
| <b>ATH</b>      | 193         | 337           | 410,475       |
| <b>P25</b>      | 201         | 307           | 350,410       |
| <b>ART</b>      | 190         | 296           | 351,422       |
| <b>RTH</b>      | 189         | 292           | 338,404       |
| <b>RTS</b>      | 185         | 286           | 347,388       |

295

296

297

298

299

300

301

302

303

304

305

306

307

308

309

310

311

312

313

314

315

316

317



318 **Table S3.** Binding energy values, atomic ratios of titania catalysts determined from XPS

| Catalyst   | Binding energy (eV) |                  |                  |                  | $Ti^{3+}$             | Ni/Ti |
|------------|---------------------|------------------|------------------|------------------|-----------------------|-------|
|            | Ni <sup>0</sup>     | Ni <sup>2+</sup> | Ti <sup>3+</sup> | Ti <sup>4+</sup> | $(Ti^{3+} + Ti^{4+})$ |       |
| <b>ATA</b> | 852.2               | 855.8            | 457.8            | 458.5            | 0.101                 | 0.424 |
| <b>ATH</b> | 852.2               | 855.5            | 457.9            | 458.6            | 0.118                 | 0.512 |
| <b>P25</b> | 852.3               | 855.6            | 457.3            | 458.5            | 0.062                 | 0.630 |
| <b>ART</b> | 852.4               | 855.5            | 457.5            | 458.6            | 0.059                 | 0.802 |
| <b>RTH</b> | 852.6               | 855.8            | 458.0            | 458.5            | 0.052                 | 0.920 |
| <b>RTS</b> | 852.5               | 855.7            | 457.9            | 458.5            | 0.067                 | 1.212 |

319

320

321

322

323

324

325

326

327

328

329

330

331

332

333 **Table S4.** Ni leaching (ppm) in the solution after reaction at different temperature.

| <b>Catalyst</b> | <b>Ni leaching</b> |              | <b>Carbon balance</b> |              |
|-----------------|--------------------|--------------|-----------------------|--------------|
|                 | <b>100°C</b>       | <b>140°C</b> | <b>100°C</b>          | <b>140°C</b> |
| <b>ATA</b>      | 1.5                | 2.2          | 94.1                  | 92.9         |
| <b>ATH</b>      | 1.8                | 3.6          | 93.3                  | 95.2         |
| <b>P25</b>      | 1.4                | 0.4          | 94.8                  | 95.7         |
| <b>ART</b>      | 2.6                | 0.3          | 98.5                  | 98.4         |
| <b>RTH</b>      | 1.2                | 0.3          | 97.7                  | 97.1         |
| <b>RTS</b>      | 2.5                | 0.6          | 97.9                  | 96.3         |

334

335

336

337

338

339

340

341

342

343

344

345

346

347

348

349

350

351

352

353

354

355 **Cartesian coordinates**

356 Cartesian coordinates (Angstroms) and energies (Hartree) of the adsorbed species on Ni  
357 cluster along reaction coordinates.

358 1. FAL to FOL on neutral Ni cluster (path a)

359 a. Ni + FAL+2H

360 E+ZPE=-2545.619714

361 G=-2545.663595

362 Ni 1.506629000 -0.924052000 1.022357000

363 Ni -0.778447000 -1.281485000 1.987863000

364 Ni -2.425586000 -1.335050000 0.112106000

365 Ni -1.184186000 -1.017015000 -2.041289000

366 Ni 1.243532000 -0.746652000 -1.463221000

367 Ni 1.519886000 1.291373000 -0.034598000

368 Ni 0.263980000 0.994243000 2.058990000

369 Ni -2.133657000 0.685957000 1.455888000

370 Ni -2.426088000 0.904408000 -1.006852000

371 Ni -0.194546000 1.233535000 -1.990100000

372 Ni -0.746197000 2.332189000 0.190397000

373 Ni -0.431842000 0.018534000 -0.017420000

374 Ni -0.200267000 -2.313701000 -0.151042000

375 C 3.077821000 -1.510490000 -1.082253000

376 C 3.164867000 -1.999403000 0.288994000

377 C 3.532083000 -0.888866000 1.122329000

378 C 3.620845000 0.244666000 0.233128000

379 O 3.637645000 -0.179571000 -1.088068000

|     |                    |              |              |              |
|-----|--------------------|--------------|--------------|--------------|
| 380 | H                  | 3.409316000  | -2.098029000 | -1.948913000 |
| 381 | H                  | 3.171786000  | -3.056655000 | 0.556524000  |
| 382 | H                  | 3.857813000  | -0.901035000 | 2.164207000  |
| 383 | C                  | 3.416403000  | 1.651966000  | 0.490125000  |
| 384 | H                  | 3.581644000  | 1.994235000  | 1.530743000  |
| 385 | O                  | 3.158087000  | 2.499521000  | -0.474704000 |
| 386 | H                  | -0.390936000 | 2.767376000  | -1.365715000 |
| 387 | H                  | -1.237474000 | 2.163352000  | 1.805178000  |
| 388 | b. TS1             |              |              |              |
| 389 | E+ZPE=-2545.570702 |              |              |              |
| 390 | G=-2545.615413     |              |              |              |
| 391 | Ni                 | 1.414998000  | -1.189363000 | 0.886298000  |
| 392 | Ni                 | -0.919928000 | -1.608627000 | 1.701682000  |
| 393 | Ni                 | -2.496093000 | -1.218629000 | -0.195700000 |
| 394 | Ni                 | -1.161356000 | -0.558967000 | -2.210244000 |
| 395 | Ni                 | 1.248999000  | -0.529085000 | -1.523822000 |
| 396 | Ni                 | 1.562411000  | 1.184731000  | 0.281027000  |
| 397 | Ni                 | 0.220143000  | 0.555030000  | 2.239631000  |
| 398 | Ni                 | -2.165669000 | 0.490212000  | 1.520761000  |
| 399 | Ni                 | -2.354996000 | 1.189391000  | -0.861668000 |
| 400 | Ni                 | -0.071375000 | 1.590201000  | -1.701083000 |
| 401 | Ni                 | -0.660341000 | 2.275043000  | 0.635716000  |
| 402 | Ni                 | -0.440084000 | 0.030788000  | -0.003970000 |
| 403 | Ni                 | -0.307612000 | -2.241334000 | -0.578251000 |
| 404 | C                  | 3.023296000  | -1.523068000 | -1.193877000 |

|     |    |                    |              |              |
|-----|----|--------------------|--------------|--------------|
| 405 | C  | 3.103549000        | -2.102212000 | 0.137659000  |
| 406 | C  | 3.440152000        | -1.032342000 | 1.046453000  |
| 407 | C  | 3.538838000        | 0.154414000  | 0.240303000  |
| 408 | O  | 3.557722000        | -0.183917000 | -1.106320000 |
| 409 | H  | 3.358432000        | -2.037622000 | -2.102606000 |
| 410 | H  | 3.158555000        | -3.174709000 | 0.332629000  |
| 411 | H  | 3.750413000        | -1.103297000 | 2.090598000  |
| 412 | C  | 3.565309000        | 1.622483000  | 0.574022000  |
| 413 | H  | 4.276015000        | 1.869687000  | 1.400318000  |
| 414 | O  | 3.425461000        | 2.460015000  | -0.439260000 |
| 415 | H  | -1.254118000       | 2.643203000  | -0.988565000 |
| 416 | H  | 2.483585000        | 1.735365000  | 1.474343000  |
| 417 | c. | IM1                |              |              |
| 418 |    | E+ZPE=-2545.601080 |              |              |
| 419 |    | G=-2545.645537     |              |              |
| 420 | Ni | 1.566324000        | -0.689007000 | 1.023209000  |
| 421 | Ni | -0.646426000       | -0.987854000 | 2.166184000  |
| 422 | Ni | -2.390352000       | -1.357288000 | 0.417318000  |
| 423 | Ni | -1.283284000       | -1.297613000 | -1.828954000 |
| 424 | Ni | 1.155303000        | -0.867869000 | -1.441297000 |
| 425 | Ni | 1.423361000        | 1.360257000  | -0.320667000 |
| 426 | Ni | 0.301673000        | 1.310061000  | 1.864297000  |
| 427 | Ni | -2.111427000       | 0.838645000  | 1.454475000  |
| 428 | Ni | -2.547373000       | 0.703409000  | -0.993563000 |
| 429 | Ni | -0.385550000       | 0.973720000  | -2.148213000 |

|     |                    |              |              |              |
|-----|--------------------|--------------|--------------|--------------|
| 430 | Ni                 | -0.867425000 | 2.340610000  | -0.104837000 |
| 431 | Ni                 | -0.465264000 | 0.033220000  | -0.013419000 |
| 432 | Ni                 | -0.142551000 | -2.285508000 | 0.157245000  |
| 433 | C                  | 2.988588000  | -1.606659000 | -1.031453000 |
| 434 | C                  | 3.025673000  | -1.990587000 | 0.377298000  |
| 435 | C                  | 3.630018000  | -0.882470000 | 1.088083000  |
| 436 | C                  | 3.947793000  | 0.090810000  | 0.116274000  |
| 437 | O                  | 3.749497000  | -0.393851000 | -1.146710000 |
| 438 | H                  | 3.207322000  | -2.305051000 | -1.853345000 |
| 439 | H                  | 2.911000000  | -3.017582000 | 0.727987000  |
| 440 | H                  | 3.918761000  | -0.829392000 | 2.139883000  |
| 441 | C                  | 4.183817000  | 1.571633000  | 0.211306000  |
| 442 | H                  | 5.090824000  | 1.839515000  | -0.375561000 |
| 443 | O                  | 3.065769000  | 2.293143000  | -0.273570000 |
| 444 | H                  | -1.708310000 | 2.129522000  | -1.613156000 |
| 445 | H                  | 4.406722000  | 1.798335000  | 1.277575000  |
| 446 | d. IM2             |              |              |              |
| 447 | E+ZPE=-2545.600857 |              |              |              |
| 448 | G=-2545.645250     |              |              |              |
| 449 | Ni                 | -1.579247000 | -0.697186000 | -1.006082000 |
| 450 | Ni                 | 0.628009000  | -1.023779000 | -2.147782000 |
| 451 | Ni                 | 2.381618000  | -1.369972000 | -0.410604000 |
| 452 | Ni                 | 1.291402000  | -1.272003000 | 1.842747000  |
| 453 | Ni                 | -1.151677000 | -0.838670000 | 1.469483000  |
| 454 | Ni                 | -1.420897000 | 1.367240000  | 0.316312000  |

|     |    |                    |              |              |
|-----|----|--------------------|--------------|--------------|
| 455 | Ni | -0.312080000       | 1.283968000  | -1.878276000 |
| 456 | Ni | 2.101520000        | 0.810262000  | -1.479584000 |
| 457 | Ni | 2.555033000        | 0.712747000  | 0.967237000  |
| 458 | Ni | 0.407526000        | 1.004543000  | 2.128727000  |
| 459 | Ni | 0.871864000        | 2.341805000  | 0.066185000  |
| 460 | Ni | 0.464636000        | 0.033730000  | 0.013202000  |
| 461 | Ni | 0.133648000        | -2.286917000 | -0.119083000 |
| 462 | C  | -2.988126000       | -1.609101000 | 1.039142000  |
| 463 | C  | -3.043358000       | -2.004262000 | -0.363993000 |
| 464 | C  | -3.630948000       | -0.892818000 | -1.082208000 |
| 465 | C  | -3.906493000       | 0.102062000  | -0.116950000 |
| 466 | O  | -3.724611000       | -0.382241000 | 1.151587000  |
| 467 | H  | -3.206538000       | -2.296563000 | 1.869618000  |
| 468 | H  | -2.937899000       | -3.033606000 | -0.709624000 |
| 469 | H  | -3.930976000       | -0.845305000 | -2.130947000 |
| 470 | C  | -4.154503000       | 1.580477000  | -0.219519000 |
| 471 | H  | -5.071898000       | 1.838919000  | 0.356087000  |
| 472 | O  | -3.050701000       | 2.317938000  | 0.272836000  |
| 473 | H  | 1.661774000        | 2.152136000  | 1.620351000  |
| 474 | H  | -4.369307000       | 1.799199000  | -1.289224000 |
| 475 | e. | TS2                |              |              |
| 476 |    | E+ZPE=-2545.558802 |              |              |
| 477 |    | G=-2545.603118     |              |              |
| 478 | Ni | 0.992353000        | -1.622992000 | 0.964485000  |
| 479 | Ni | -1.456502000       | -1.557831000 | 1.496695000  |

|     |        |              |              |              |
|-----|--------|--------------|--------------|--------------|
| 480 | Ni     | -2.684794000 | -0.713425000 | -0.501093000 |
| 481 | Ni     | -1.019306000 | -0.246432000 | -2.313155000 |
| 482 | Ni     | 1.250577000  | -0.793634000 | -1.395861000 |
| 483 | Ni     | 1.716581000  | 0.690340000  | 0.566533000  |
| 484 | Ni     | 0.053658000  | 0.261596000  | 2.328196000  |
| 485 | Ni     | -2.192366000 | 0.771422000  | 1.377066000  |
| 486 | Ni     | -1.954435000 | 1.639357000  | -0.945076000 |
| 487 | Ni     | 0.436276000  | 1.569576000  | -1.518858000 |
| 488 | Ni     | -0.246386000 | 2.227799000  | 0.796248000  |
| 489 | Ni     | -0.444144000 | 0.034113000  | -0.005292000 |
| 490 | Ni     | -0.738428000 | -2.171919000 | -0.753344000 |
| 491 | C      | 2.932371000  | -1.777109000 | -0.956500000 |
| 492 | C      | 2.903432000  | -2.006473000 | 0.488119000  |
| 493 | C      | 3.350699000  | -0.753327000 | 1.089238000  |
| 494 | C      | 3.663507000  | 0.134053000  | 0.024081000  |
| 495 | O      | 3.637408000  | -0.542998000 | -1.199221000 |
| 496 | H      | 3.198490000  | -2.546964000 | -1.690382000 |
| 497 | H      | 3.031882000  | -2.998093000 | 0.943565000  |
| 498 | H      | 3.612673000  | -0.595394000 | 2.135558000  |
| 499 | C      | 4.115228000  | 1.573746000  | 0.008473000  |
| 500 | H      | 4.566700000  | 1.787696000  | -0.982390000 |
| 501 | O      | 2.996500000  | 2.422263000  | 0.296801000  |
| 502 | H      | 1.864341000  | 2.090539000  | -0.587202000 |
| 503 | H      | 4.896876000  | 1.739588000  | 0.776550000  |
| 504 | f. FOL |              |              |              |



|     |                    |              |              |              |
|-----|--------------------|--------------|--------------|--------------|
| 505 | E+ZPE=-2545.579669 |              |              |              |
| 506 | G=-2545.625067     |              |              |              |
| 507 | Ni                 | 1.284067000  | -0.976648000 | 1.245139000  |
| 508 | Ni                 | -0.925894000 | -0.438971000 | 2.297734000  |
| 509 | Ni                 | -2.702585000 | -0.667433000 | 0.557609000  |
| 510 | Ni                 | -1.619044000 | -1.355556000 | -1.595107000 |
| 511 | Ni                 | 0.847035000  | -1.527969000 | -1.159732000 |
| 512 | Ni                 | 1.712518000  | 0.720009000  | -0.475065000 |
| 513 | Ni                 | 0.615047000  | 1.413260000  | 1.613907000  |
| 514 | Ni                 | -1.833554000 | 1.533639000  | 1.169151000  |
| 515 | Ni                 | -2.287087000 | 1.036434000  | -1.228393000 |
| 516 | Ni                 | -0.137501000 | 0.480043000  | -2.287390000 |
| 517 | Ni                 | -0.222464000 | 2.305254000  | -0.578264000 |
| 518 | Ni                 | -0.470629000 | 0.039694000  | -0.024850000 |
| 519 | Ni                 | -0.795381000 | -2.197340000 | 0.604676000  |
| 520 | C                  | 2.776851000  | -1.871424000 | -0.954041000 |
| 521 | C                  | 2.850427000  | -2.169423000 | 0.475302000  |
| 522 | C                  | 3.311723000  | -0.985574000 | 1.146218000  |
| 523 | C                  | 3.509591000  | 0.029979000  | 0.118396000  |
| 524 | O                  | 3.475830000  | -0.617504000 | -1.158404000 |
| 525 | H                  | 3.057560000  | -2.599523000 | -1.730897000 |
| 526 | H                  | 2.819767000  | -3.182137000 | 0.880942000  |
| 527 | H                  | 3.727689000  | -0.912791000 | 2.154983000  |
| 528 | C                  | 4.435527000  | 1.210826000  | 0.228622000  |
| 529 | H                  | 5.393601000  | 1.011653000  | -0.284045000 |

|     |                                              |              |              |              |
|-----|----------------------------------------------|--------------|--------------|--------------|
| 530 | O                                            | 3.908786000  | 2.413517000  | -0.374400000 |
| 531 | H                                            | 2.964380000  | 2.462712000  | -0.054421000 |
| 532 | H                                            | 4.648543000  | 1.362028000  | 1.305220000  |
| 533 | 2. FAL to FOL on neutral Ni cluster (path b) |              |              |              |
| 534 | a. Ni + FAL+2H                               |              |              |              |
| 535 | E+ZPE=-2545.619714                           |              |              |              |
| 536 | G=-2545.663595                               |              |              |              |
| 537 | Ni                                           | 1.506629000  | -0.924052000 | 1.022357000  |
| 538 | Ni                                           | -0.778447000 | -1.281485000 | 1.987863000  |
| 539 | Ni                                           | -2.425586000 | -1.335050000 | 0.112106000  |
| 540 | Ni                                           | -1.184186000 | -1.017015000 | -2.041289000 |
| 541 | Ni                                           | 1.243532000  | -0.746652000 | -1.463221000 |
| 542 | Ni                                           | 1.519886000  | 1.291373000  | -0.034598000 |
| 543 | Ni                                           | 0.263980000  | 0.994243000  | 2.058990000  |
| 544 | Ni                                           | -2.133657000 | 0.685957000  | 1.455888000  |
| 545 | Ni                                           | -2.426088000 | 0.904408000  | -1.006852000 |
| 546 | Ni                                           | -0.194546000 | 1.233535000  | -1.990100000 |
| 547 | Ni                                           | -0.746197000 | 2.332189000  | 0.190397000  |
| 548 | Ni                                           | -0.431842000 | 0.018534000  | -0.017420000 |
| 549 | Ni                                           | -0.200267000 | -2.313701000 | -0.151042000 |
| 550 | C                                            | 3.077821000  | -1.510490000 | -1.082253000 |
| 551 | C                                            | 3.164867000  | -1.999403000 | 0.288994000  |
| 552 | C                                            | 3.532083000  | -0.888866000 | 1.122329000  |
| 553 | C                                            | 3.620845000  | 0.244666000  | 0.233128000  |
| 554 | O                                            | 3.637645000  | -0.179571000 | -1.088068000 |

|     |                    |              |              |              |
|-----|--------------------|--------------|--------------|--------------|
| 555 | H                  | 3.409316000  | -2.098029000 | -1.948913000 |
| 556 | H                  | 3.171786000  | -3.056655000 | 0.556524000  |
| 557 | H                  | 3.857813000  | -0.901035000 | 2.164207000  |
| 558 | C                  | 3.416403000  | 1.651966000  | 0.490125000  |
| 559 | H                  | 3.581644000  | 1.994235000  | 1.530743000  |
| 560 | O                  | 3.158087000  | 2.499521000  | -0.474704000 |
| 561 | H                  | -0.390936000 | 2.767376000  | -1.365715000 |
| 562 | H                  | -1.237474000 | 2.163352000  | 1.805178000  |
| 563 | b. TS1             |              |              |              |
| 564 | E+ZPE=-2545.557691 |              |              |              |
| 565 | G=-2545.601910     |              |              |              |
| 566 | Ni                 | 1.476910000  | -0.927495000 | 1.047966000  |
| 567 | Ni                 | -0.802836000 | -1.134634000 | 2.064684000  |
| 568 | Ni                 | -2.480016000 | -1.240469000 | 0.217901000  |
| 569 | Ni                 | -1.261845000 | -1.104541000 | -1.967598000 |
| 570 | Ni                 | 1.183608000  | -0.893149000 | -1.440248000 |
| 571 | Ni                 | 1.558888000  | 1.217942000  | -0.145193000 |
| 572 | Ni                 | 0.325476000  | 1.104408000  | 1.973450000  |
| 573 | Ni                 | -2.091322000 | 0.846271000  | 1.429511000  |
| 574 | Ni                 | -2.414526000 | 0.924124000  | -1.037925000 |
| 575 | Ni                 | -0.191528000 | 1.104911000  | -2.071271000 |
| 576 | Ni                 | -0.658502000 | 2.353899000  | 0.049930000  |
| 577 | Ni                 | -0.439023000 | 0.024136000  | -0.023227000 |
| 578 | Ni                 | -0.297729000 | -2.318801000 | -0.013846000 |
| 579 | C                  | 2.989152000  | -1.601700000 | -1.025531000 |

|     |    |                    |              |              |
|-----|----|--------------------|--------------|--------------|
| 580 | C  | 3.099698000        | -2.043674000 | 0.373340000  |
| 581 | C  | 3.517043000        | -0.925465000 | 1.160764000  |
| 582 | C  | 3.632702000        | 0.185431000  | 0.222314000  |
| 583 | O  | 3.635580000        | -0.291740000 | -1.084345000 |
| 584 | H  | 3.342770000        | -2.240152000 | -1.849442000 |
| 585 | H  | 3.094312000        | -3.092773000 | 0.673693000  |
| 586 | H  | 3.883778000        | -0.921073000 | 2.188326000  |
| 587 | C  | 3.484662000        | 1.576772000  | 0.456712000  |
| 588 | H  | 3.614443000        | 1.951501000  | 1.482072000  |
| 589 | O  | 3.300764000        | 2.460539000  | -0.567282000 |
| 590 | H  | 1.962078000        | 2.724893000  | -0.499724000 |
| 591 | H  | -1.139168000       | 2.294214000  | 1.736769000  |
| 592 | c. | IM1                |              |              |
| 593 |    | E+ZPE=-2545.586382 |              |              |
| 594 |    | G=-2545.631338     |              |              |
| 595 | Ni | 1.229943000        | -1.250464000 | 1.087542000  |
| 596 | Ni | -1.149993000       | -1.283457000 | 1.872540000  |
| 597 | Ni | -2.636964000       | -0.978398000 | -0.110246000 |
| 598 | Ni | -1.199941000       | -0.758042000 | -2.151010000 |
| 599 | Ni | 1.188804000        | -0.910203000 | -1.394690000 |
| 600 | Ni | 1.670893000        | 0.983304000  | 0.170734000  |
| 601 | Ni | 0.227617000        | 0.788720000  | 2.152961000  |
| 602 | Ni | -2.135694000       | 0.899367000  | 1.371833000  |
| 603 | Ni | -2.200844000       | 1.284388000  | -1.087585000 |
| 604 | Ni | 0.123087000        | 1.298868000  | -1.895781000 |

|     |                    |              |              |              |
|-----|--------------------|--------------|--------------|--------------|
| 605 | Ni                 | -0.413946000 | 2.363244000  | 0.305012000  |
| 606 | Ni                 | -0.451703000 | 0.041668000  | -0.021288000 |
| 607 | Ni                 | -0.578864000 | -2.288014000 | -0.281315000 |
| 608 | C                  | 2.963349000  | -1.717528000 | -1.043788000 |
| 609 | C                  | 2.935972000  | -2.176227000 | 0.345112000  |
| 610 | C                  | 3.252786000  | -1.053304000 | 1.182999000  |
| 611 | C                  | 3.516424000  | 0.061368000  | 0.257960000  |
| 612 | O                  | 3.659227000  | -0.434312000 | -1.045378000 |
| 613 | H                  | 3.330527000  | -2.359143000 | -1.856211000 |
| 614 | H                  | 2.929163000  | -3.230091000 | 0.632618000  |
| 615 | H                  | 3.608566000  | -1.074565000 | 2.215469000  |
| 616 | C                  | 3.599796000  | 1.457215000  | 0.512096000  |
| 617 | H                  | 3.768837000  | 1.760824000  | 1.557210000  |
| 618 | O                  | 4.190915000  | 2.273994000  | -0.473046000 |
| 619 | H                  | 3.720524000  | 3.127634000  | -0.431185000 |
| 620 | H                  | -0.595783000 | 2.281259000  | 1.979340000  |
| 621 | d. IM2             |              |              |              |
| 622 | E+ZPE=-2545.588462 |              |              |              |
| 623 | G=-2545.633246     |              |              |              |
| 624 | Ni                 | -1.221244000 | -1.409309000 | -0.893637000 |
| 625 | Ni                 | 1.188513000  | -1.677367000 | -1.516610000 |
| 626 | Ni                 | 2.586782000  | -0.989964000 | 0.437937000  |
| 627 | Ni                 | 1.059051000  | -0.294721000 | 2.295738000  |
| 628 | Ni                 | -1.295136000 | -0.537862000 | 1.457139000  |
| 629 | Ni                 | -1.624067000 | 0.980217000  | -0.508295000 |

|     |    |                    |              |              |
|-----|----|--------------------|--------------|--------------|
| 630 | Ni | -0.087026000       | 0.327459000  | -2.309124000 |
| 631 | Ni | 2.234585000        | 0.535574000  | -1.438636000 |
| 632 | Ni | 2.189660000        | 1.442461000  | 0.882484000  |
| 633 | Ni | -0.169100000       | 1.695111000  | 1.531608000  |
| 634 | Ni | 0.520773000        | 2.238433000  | -0.814140000 |
| 635 | Ni | 0.451903000        | 0.049457000  | 0.010606000  |
| 636 | Ni | 0.472368000        | -2.174830000 | 0.767072000  |
| 637 | C  | -2.956615000       | -1.617620000 | 1.169226000  |
| 638 | C  | -2.948405000       | -2.211269000 | -0.159053000 |
| 639 | C  | -3.215154000       | -1.153777000 | -1.106072000 |
| 640 | C  | -3.466110000       | 0.046336000  | -0.308590000 |
| 641 | O  | -3.571980000       | -0.307739000 | 1.058655000  |
| 642 | H  | -3.300385000       | -2.147794000 | 2.065622000  |
| 643 | H  | -2.999482000       | -3.286904000 | -0.343264000 |
| 644 | H  | -3.551457000       | -1.259730000 | -2.139884000 |
| 645 | C  | -3.591559000       | 1.422898000  | -0.649458000 |
| 646 | H  | -3.903639000       | 1.694661000  | -1.663336000 |
| 647 | O  | -4.060038000       | 2.342045000  | 0.302515000  |
| 648 | H  | -3.590734000       | 2.123081000  | 1.134600000  |
| 649 | H  | -1.128785000       | 2.512426000  | -0.879423000 |
| 650 | e. | TS2                |              |              |
| 651 |    | E+ZPE=-2545.567565 |              |              |
| 652 |    | G=-2545.612272     |              |              |
| 653 | Ni | 1.188150000        | -1.423600000 | 0.907210000  |
| 654 | Ni | -1.214795000       | -1.597545000 | 1.588458000  |

|     |    |              |              |              |
|-----|----|--------------|--------------|--------------|
| 655 | Ni | -2.634831000 | -0.935589000 | -0.358702000 |
| 656 | Ni | -1.128845000 | -0.350391000 | -2.270832000 |
| 657 | Ni | 1.235883000  | -0.634814000 | -1.475086000 |
| 658 | Ni | 1.650457000  | 0.937322000  | 0.429515000  |
| 659 | Ni | 0.136612000  | 0.393339000  | 2.284503000  |
| 660 | Ni | -2.196776000 | 0.641880000  | 1.455995000  |
| 661 | Ni | -2.176407000 | 1.467374000  | -0.895560000 |
| 662 | Ni | 0.174044000  | 1.626522000  | -1.602698000 |
| 663 | Ni | -0.447799000 | 2.270135000  | 0.737122000  |
| 664 | Ni | -0.461545000 | 0.053238000  | -0.012463000 |
| 665 | Ni | -0.563814000 | -2.194082000 | -0.690793000 |
| 666 | C  | 2.963339000  | -1.620274000 | -1.179727000 |
| 667 | C  | 2.913930000  | -2.217616000 | 0.152282000  |
| 668 | C  | 3.217091000  | -1.175087000 | 1.107094000  |
| 669 | C  | 3.486196000  | 0.011349000  | 0.314975000  |
| 670 | O  | 3.621586000  | -0.328505000 | -1.035193000 |
| 671 | H  | 3.355504000  | -2.162622000 | -2.049506000 |
| 672 | H  | 2.941371000  | -3.295648000 | 0.330677000  |
| 673 | H  | 3.517693000  | -1.286896000 | 2.150868000  |
| 674 | C  | 3.636257000  | 1.422534000  | 0.648378000  |
| 675 | H  | 4.044829000  | 1.631876000  | 1.644474000  |
| 676 | O  | 4.255845000  | 2.238601000  | -0.314766000 |
| 677 | H  | 3.837665000  | 2.002510000  | -1.168535000 |
| 678 | H  | 2.293240000  | 2.198447000  | 0.926960000  |

679 f. FOL

|     |                    |              |              |              |
|-----|--------------------|--------------|--------------|--------------|
| 680 | E+ZPE=-2545.579669 |              |              |              |
| 681 | G=-2545.625067     |              |              |              |
| 682 | Ni                 | 1.284067000  | -0.976648000 | 1.245139000  |
| 683 | Ni                 | -0.925894000 | -0.438971000 | 2.297734000  |
| 684 | Ni                 | -2.702585000 | -0.667433000 | 0.557609000  |
| 685 | Ni                 | -1.619044000 | -1.355556000 | -1.595107000 |
| 686 | Ni                 | 0.847035000  | -1.527969000 | -1.159732000 |
| 687 | Ni                 | 1.712518000  | 0.720009000  | -0.475065000 |
| 688 | Ni                 | 0.615047000  | 1.413260000  | 1.613907000  |
| 689 | Ni                 | -1.833554000 | 1.533639000  | 1.169151000  |
| 690 | Ni                 | -2.287087000 | 1.036434000  | -1.228393000 |
| 691 | Ni                 | -0.137501000 | 0.480043000  | -2.287390000 |
| 692 | Ni                 | -0.222464000 | 2.305254000  | -0.578264000 |
| 693 | Ni                 | -0.470629000 | 0.039694000  | -0.024850000 |
| 694 | Ni                 | -0.795381000 | -2.197340000 | 0.604676000  |
| 695 | C                  | 2.776851000  | -1.871424000 | -0.954041000 |
| 696 | C                  | 2.850427000  | -2.169423000 | 0.475302000  |
| 697 | C                  | 3.311723000  | -0.985574000 | 1.146218000  |
| 698 | C                  | 3.509591000  | 0.029979000  | 0.118396000  |
| 699 | O                  | 3.475830000  | -0.617504000 | -1.158404000 |
| 700 | H                  | 3.057560000  | -2.599523000 | -1.730897000 |
| 701 | H                  | 2.819767000  | -3.182137000 | 0.880942000  |
| 702 | H                  | 3.727689000  | -0.912791000 | 2.154983000  |
| 703 | C                  | 4.435527000  | 1.210826000  | 0.228622000  |
| 704 | H                  | 5.393601000  | 1.011653000  | -0.284045000 |



|     |                                                   |              |              |              |
|-----|---------------------------------------------------|--------------|--------------|--------------|
| 705 | O                                                 | 3.908786000  | 2.413517000  | -0.374400000 |
| 706 | H                                                 | 2.964380000  | 2.462712000  | -0.054421000 |
| 707 | H                                                 | 4.648543000  | 1.362028000  | 1.305220000  |
| 708 | 3. FAL to FOL on charged (-1) Ni cluster (path a) |              |              |              |
| 709 | a. Ni + FAL+2H                                    |              |              |              |
| 710 | E+ZPE=-2545.733606                                |              |              |              |
| 711 | G=-2545.777336                                    |              |              |              |
| 712 | Ni                                                | -1.120644000 | -1.073895000 | -2.031095000 |
| 713 | Ni                                                | -0.185326000 | 1.223981000  | -1.993234000 |
| 714 | Ni                                                | 1.473951000  | 1.414373000  | -0.098030000 |
| 715 | Ni                                                | 1.507518000  | -0.911105000 | 1.115389000  |
| 716 | Ni                                                | -0.108383000 | -2.368227000 | -0.142849000 |
| 717 | Ni                                                | -2.320787000 | -1.347056000 | 0.082393000  |
| 718 | Ni                                                | -2.410126000 | 0.814893000  | -1.041974000 |
| 719 | Ni                                                | -0.847346000 | 2.302899000  | 0.153385000  |
| 720 | Ni                                                | 0.157172000  | 1.009659000  | 2.043567000  |
| 721 | Ni                                                | -0.793880000 | -1.272878000 | 1.997042000  |
| 722 | Ni                                                | -2.204533000 | 0.693480000  | 1.427809000  |
| 723 | Ni                                                | -0.379177000 | -0.002504000 | -0.004746000 |
| 724 | Ni                                                | 1.290478000  | -0.782532000 | -1.504048000 |
| 725 | C                                                 | 3.101464000  | -1.474206000 | -1.000072000 |
| 726 | C                                                 | 3.188157000  | -1.927970000 | 0.389256000  |
| 727 | C                                                 | 3.510564000  | -0.789489000 | 1.206535000  |
| 728 | C                                                 | 3.551514000  | 0.334200000  | 0.298334000  |
| 729 | O                                                 | 3.601790000  | -0.110685000 | -1.018731000 |

|     |                    |              |              |              |
|-----|--------------------|--------------|--------------|--------------|
| 730 | H                  | 3.524456000  | -2.063566000 | -1.826838000 |
| 731 | H                  | 3.264755000  | -2.979227000 | 0.671029000  |
| 732 | H                  | 3.863391000  | -0.777377000 | 2.240146000  |
| 733 | C                  | 3.337799000  | 1.741534000  | 0.533461000  |
| 734 | H                  | 3.460606000  | 2.086760000  | 1.579050000  |
| 735 | O                  | 3.134924000  | 2.594571000  | -0.446647000 |
| 736 | H                  | -0.492543000 | 2.747844000  | -1.400193000 |
| 737 | H                  | -1.301045000 | 2.179602000  | 1.793750000  |
| 738 | b. TS1             |              |              |              |
| 739 | E+ZPE=-2545.678789 |              |              |              |
| 740 | G=-2545.722791     |              |              |              |
| 741 | Ni                 | -1.097722000 | -0.725542000 | -2.178579000 |
| 742 | Ni                 | -0.128794000 | 1.521090000  | -1.766321000 |
| 743 | Ni                 | 1.486771000  | 1.386589000  | 0.170914000  |
| 744 | Ni                 | 1.455306000  | -1.098123000 | 1.011780000  |
| 745 | Ni                 | -0.151815000 | -2.313708000 | -0.490697000 |
| 746 | Ni                 | -2.353069000 | -1.297799000 | -0.158747000 |
| 747 | Ni                 | -2.381978000 | 1.012623000  | -0.937997000 |
| 748 | Ni                 | -0.826134000 | 2.269128000  | 0.506041000  |
| 749 | Ni                 | 0.112439000  | 0.682164000  | 2.195680000  |
| 750 | Ni                 | -0.872305000 | -1.547711000 | 1.777114000  |
| 751 | Ni                 | -2.238399000 | 0.509013000  | 1.487375000  |
| 752 | Ni                 | -0.389627000 | 0.007292000  | 0.004569000  |
| 753 | Ni                 | 1.303745000  | -0.564597000 | -1.560351000 |
| 754 | C                  | 3.047214000  | -1.503493000 | -1.075539000 |

|     |    |                    |              |              |
|-----|----|--------------------|--------------|--------------|
| 755 | C  | 3.131991000        | -2.023271000 | 0.286558000  |
| 756 | C  | 3.470047000        | -0.913518000 | 1.149975000  |
| 757 | C  | 3.535305000        | 0.241262000  | 0.305694000  |
| 758 | O  | 3.542200000        | -0.137939000 | -1.028465000 |
| 759 | H  | 3.458299000        | -2.044152000 | -1.939083000 |
| 760 | H  | 3.232193000        | -3.085785000 | 0.517144000  |
| 761 | H  | 3.785161000        | -0.941666000 | 2.195275000  |
| 762 | C  | 3.466898000        | 1.714143000  | 0.597513000  |
| 763 | H  | 4.151620000        | 2.028507000  | 1.421556000  |
| 764 | O  | 3.310153000        | 2.522046000  | -0.452786000 |
| 765 | H  | -1.437418000       | 2.547489000  | -1.093499000 |
| 766 | H  | 2.366856000        | 1.800329000  | 1.461513000  |
| 767 | c. | IM1                |              |              |
| 768 |    | E+ZPE=-2545.706244 |              |              |
| 769 |    | G=-2545.750585     |              |              |
| 770 | Ni | -1.224009000       | -1.291372000 | -1.854163000 |
| 771 | Ni | -0.333021000       | 1.008800000  | -2.121689000 |
| 772 | Ni | 1.407969000        | 1.437810000  | -0.342536000 |
| 773 | Ni | 1.542642000        | -0.733114000 | 1.124126000  |
| 774 | Ni | -0.101009000       | -2.347060000 | 0.118211000  |
| 775 | Ni | -2.320036000       | -1.338094000 | 0.332062000  |
| 776 | Ni | -2.503122000       | 0.679807000  | -1.024622000 |
| 777 | Ni | -0.916139000       | 2.316182000  | -0.082083000 |
| 778 | Ni | 0.199566000        | 1.261896000  | 1.892232000  |
| 779 | Ni | -0.708356000       | -1.024166000 | 2.150440000  |

|     |                    |              |              |              |
|-----|--------------------|--------------|--------------|--------------|
| 780 | Ni                 | -2.181672000 | 0.844164000  | 1.430261000  |
| 781 | Ni                 | -0.411069000 | 0.014979000  | 0.000028000  |
| 782 | Ni                 | 1.202517000  | -0.908057000 | -1.479463000 |
| 783 | C                  | 3.021568000  | -1.573384000 | -0.983460000 |
| 784 | C                  | 3.064464000  | -1.943632000 | 0.432538000  |
| 785 | C                  | 3.597631000  | -0.797052000 | 1.142476000  |
| 786 | C                  | 3.857779000  | 0.193963000  | 0.169182000  |
| 787 | O                  | 3.711503000  | -0.310068000 | -1.094697000 |
| 788 | H                  | 3.331461000  | -2.265463000 | -1.782619000 |
| 789 | H                  | 3.032420000  | -2.976777000 | 0.783014000  |
| 790 | H                  | 3.894336000  | -0.726331000 | 2.191900000  |
| 791 | C                  | 4.106878000  | 1.674062000  | 0.264486000  |
| 792 | H                  | 5.037375000  | 1.920268000  | -0.297967000 |
| 793 | O                  | 3.019769000  | 2.424881000  | -0.243296000 |
| 794 | H                  | -1.667135000 | 2.102560000  | -1.677074000 |
| 795 | H                  | 4.312160000  | 1.893811000  | 1.336800000  |
| 796 | d. IM2             |              |              |              |
| 797 | E+ZPE=-2545.707166 |              |              |              |
| 798 | G=-2545.751857     |              |              |              |
| 799 | Ni                 | -1.227917000 | -1.321859000 | -1.830847000 |
| 800 | Ni                 | -0.369807000 | 0.987581000  | -2.135615000 |
| 801 | Ni                 | 1.383963000  | 1.459044000  | -0.380178000 |
| 802 | Ni                 | 1.565831000  | -0.692269000 | 1.108025000  |
| 803 | Ni                 | -0.068436000 | -2.340204000 | 0.139802000  |
| 804 | Ni                 | -2.298631000 | -1.359155000 | 0.367859000  |

|     |    |                    |              |              |
|-----|----|--------------------|--------------|--------------|
| 805 | Ni | -2.524477000       | 0.640703000  | -1.008165000 |
| 806 | Ni | -0.950748000       | 2.308767000  | -0.101794000 |
| 807 | Ni | 0.203160000        | 1.291660000  | 1.870092000  |
| 808 | Ni | -0.670162000       | -1.003588000 | 2.163815000  |
| 809 | Ni | -2.176433000       | 0.836796000  | 1.440829000  |
| 810 | Ni | -0.411714000       | 0.015216000  | -0.000791000 |
| 811 | Ni | 1.194947000        | -0.903743000 | -1.489588000 |
| 812 | C  | 3.013136000        | -1.557397000 | -0.982500000 |
| 813 | C  | 3.052729000        | -1.929509000 | 0.436906000  |
| 814 | C  | 3.611650000        | -0.793568000 | 1.145444000  |
| 815 | C  | 3.885431000        | 0.190936000  | 0.169189000  |
| 816 | O  | 3.731338000        | -0.308781000 | -1.093738000 |
| 817 | H  | 3.317468000        | -2.258469000 | -1.777165000 |
| 818 | H  | 3.012368000        | -2.964083000 | 0.783470000  |
| 819 | H  | 3.915922000        | -0.729459000 | 2.193098000  |
| 820 | C  | 4.113100000        | 1.673807000  | 0.258862000  |
| 821 | H  | 5.039894000        | 1.935511000  | -0.301764000 |
| 822 | O  | 3.014651000        | 2.401640000  | -0.258223000 |
| 823 | H  | -1.806209000       | 2.131475000  | -1.596005000 |
| 824 | H  | 4.308207000        | 1.906029000  | 1.330198000  |
| 825 | e. | TS2                |              |              |
| 826 |    | E+ZPE=-2545.663157 |              |              |
| 827 |    | G=-2545.707256     |              |              |
| 828 | Ni | -0.905444000       | -0.288308000 | -2.326913000 |
| 829 | Ni | 0.519380000        | 1.559987000  | -1.492082000 |

|     |        |              |              |              |
|-----|--------|--------------|--------------|--------------|
| 830 | Ni     | 1.706797000  | 0.804054000  | 0.610715000  |
| 831 | Ni     | 0.914031000  | -1.652749000 | 1.088089000  |
| 832 | Ni     | -0.677222000 | -2.232739000 | -0.770643000 |
| 833 | Ni     | -2.576950000 | -0.699831000 | -0.594112000 |
| 834 | Ni     | -1.895963000 | 1.598901000  | -1.040436000 |
| 835 | Ni     | -0.335786000 | 2.240793000  | 0.761716000  |
| 836 | Ni     | -0.110802000 | 0.298176000  | 2.318031000  |
| 837 | Ni     | -1.544398000 | -1.528956000 | 1.464355000  |
| 838 | Ni     | -2.282425000 | 0.835414000  | 1.289078000  |
| 839 | Ni     | -0.403126000 | 0.004941000  | 0.007332000  |
| 840 | Ni     | 1.328450000  | -0.840116000 | -1.387692000 |
| 841 | C      | 2.896925000  | -1.872208000 | -0.739394000 |
| 842 | C      | 2.854410000  | -1.975352000 | 0.718163000  |
| 843 | C      | 3.282474000  | -0.670326000 | 1.217540000  |
| 844 | C      | 3.591230000  | 0.141438000  | 0.090718000  |
| 845 | O      | 3.578112000  | -0.639894000 | -1.085562000 |
| 846 | H      | 3.197336000  | -2.697225000 | -1.396613000 |
| 847 | H      | 3.029773000  | -2.920262000 | 1.252656000  |
| 848 | H      | 3.557353000  | -0.441264000 | 2.247716000  |
| 849 | C      | 4.143743000  | 1.542047000  | -0.022426000 |
| 850 | H      | 4.583670000  | 1.658031000  | -1.036202000 |
| 851 | O      | 3.106515000  | 2.490475000  | 0.241312000  |
| 852 | H      | 1.956546000  | 2.123166000  | -0.580662000 |
| 853 | H      | 4.962439000  | 1.691467000  | 0.711229000  |
| 854 | f. FOL |              |              |              |

|     |                    |              |              |              |
|-----|--------------------|--------------|--------------|--------------|
| 855 | E+ZPE=-2545.680850 |              |              |              |
| 856 | G=-2545.726073     |              |              |              |
| 857 | Ni                 | -1.630469000 | -1.342136000 | -1.583820000 |
| 858 | Ni                 | -0.103615000 | 0.480408000  | -2.285811000 |
| 859 | Ni                 | 1.729645000  | 0.736937000  | -0.562245000 |
| 860 | Ni                 | 1.249276000  | -1.026020000 | 1.321688000  |
| 861 | Ni                 | -0.824723000 | -2.251220000 | 0.603550000  |
| 862 | Ni                 | -2.637659000 | -0.609546000 | 0.521263000  |
| 863 | Ni                 | -2.245304000 | 1.046672000  | -1.224577000 |
| 864 | Ni                 | -0.221916000 | 2.301875000  | -0.571771000 |
| 865 | Ni                 | 0.580214000  | 1.391196000  | 1.612361000  |
| 866 | Ni                 | -0.961120000 | -0.418514000 | 2.297529000  |
| 867 | Ni                 | -1.828615000 | 1.610952000  | 1.155884000  |
| 868 | Ni                 | -0.421108000 | 0.019098000  | -0.006341000 |
| 869 | Ni                 | 0.808630000  | -1.622591000 | -1.202805000 |
| 870 | C                  | 2.735701000  | -1.851710000 | -0.925105000 |
| 871 | C                  | 2.823527000  | -2.142819000 | 0.510911000  |
| 872 | C                  | 3.269791000  | -0.954988000 | 1.187626000  |
| 873 | C                  | 3.463730000  | 0.074284000  | 0.168624000  |
| 874 | O                  | 3.413174000  | -0.564796000 | -1.120599000 |
| 875 | H                  | 3.105458000  | -2.570892000 | -1.676040000 |
| 876 | H                  | 2.846501000  | -3.160859000 | 0.906373000  |
| 877 | H                  | 3.715674000  | -0.895185000 | 2.185109000  |
| 878 | C                  | 4.433696000  | 1.219674000  | 0.285116000  |
| 879 | H                  | 5.405790000  | 0.966776000  | -0.177707000 |

|     |                                                   |              |              |              |
|-----|---------------------------------------------------|--------------|--------------|--------------|
| 880 | O                                                 | 3.981144000  | 2.425374000  | -0.364869000 |
| 881 | H                                                 | 2.994885000  | 2.444299000  | -0.181982000 |
| 882 | H                                                 | 4.607902000  | 1.385483000  | 1.367615000  |
| 883 | 4. FAL to FOL on charged (-1) Ni cluster (path b) |              |              |              |
| 884 | a. Ni + FAL+2H                                    |              |              |              |
| 885 | E+ZPE=-2545.733025                                |              |              |              |
| 886 | G=-2545.776759                                    |              |              |              |
| 887 | Ni                                                | -1.084290000 | -1.217144000 | -1.959602000 |
| 888 | Ni                                                | -0.328339000 | 1.141999000  | -2.058880000 |
| 889 | Ni                                                | 1.365964000  | 1.549329000  | -0.214301000 |
| 890 | Ni                                                | 1.593245000  | -0.711417000 | 1.102384000  |
| 891 | Ni                                                | 0.065021000  | -2.342640000 | -0.044629000 |
| 892 | Ni                                                | -2.213023000 | -1.476739000 | 0.194605000  |
| 893 | Ni                                                | -2.489712000 | 0.616649000  | -1.022283000 |
| 894 | Ni                                                | -1.022176000 | 2.256129000  | 0.073571000  |
| 895 | Ni                                                | 0.131917000  | 1.147956000  | 1.974757000  |
| 896 | Ni                                                | -0.645564000 | -1.199096000 | 2.066710000  |
| 897 | Ni                                                | -2.207172000 | 0.635318000  | 1.435417000  |
| 898 | Ni                                                | -0.377181000 | -0.001226000 | -0.010974000 |
| 899 | Ni                                                | 1.309612000  | -0.722666000 | -1.517493000 |
| 900 | C                                                 | 3.069145000  | -1.464350000 | -0.982930000 |
| 901 | C                                                 | 3.183214000  | -1.895167000 | 0.421085000  |
| 902 | C                                                 | 3.572375000  | -0.762101000 | 1.214035000  |
| 903 | C                                                 | 3.547904000  | 0.354376000  | 0.294025000  |
| 904 | O                                                 | 3.595218000  | -0.100983000 | -1.022156000 |



|     |    |                    |              |              |
|-----|----|--------------------|--------------|--------------|
| 905 | H  | 3.511031000        | -2.072987000 | -1.787719000 |
| 906 | H  | 3.236971000        | -2.944171000 | 0.716569000  |
| 907 | H  | 3.958486000        | -0.748426000 | 2.235510000  |
| 908 | C  | 3.257745000        | 1.750805000  | 0.506986000  |
| 909 | H  | 3.338373000        | 2.107637000  | 1.552982000  |
| 910 | O  | 3.090932000        | 2.599220000  | -0.486346000 |
| 911 | H  | 0.154943000        | 2.530921000  | -1.135761000 |
| 912 | H  | -2.223704000       | 2.299094000  | 1.227328000  |
| 913 | b. | TS1                |              |              |
| 914 |    | E+ZPE=-2545.668020 |              |              |
| 915 |    | G=-2545.711773     |              |              |
| 916 | Ni | -1.188986000       | -1.166502000 | -1.954551000 |
| 917 | Ni | -0.233888000       | 1.118539000  | -2.068841000 |
| 918 | Ni | 1.482420000        | 1.394320000  | -0.220589000 |
| 919 | Ni | 1.511440000        | -0.866542000 | 1.114831000  |
| 920 | Ni | -0.146650000       | -2.370617000 | -0.026284000 |
| 921 | Ni | -2.343198000       | -1.311515000 | 0.196852000  |
| 922 | Ni | -2.435848000       | 0.788029000  | -1.037316000 |
| 923 | Ni | -0.837393000       | 2.305289000  | 0.052048000  |
| 924 | Ni | 0.211058000        | 1.117638000  | 1.966378000  |
| 925 | Ni | -0.764339000       | -1.153805000 | 2.073126000  |
| 926 | Ni | -2.161423000       | 0.802179000  | 1.421431000  |
| 927 | Ni | -0.387349000       | 0.000055000  | -0.012503000 |
| 928 | Ni | 1.236830000        | -0.874811000 | -1.506554000 |
| 929 | C  | 3.023966000        | -1.512706000 | -0.976259000 |

|     |    |                    |              |              |
|-----|----|--------------------|--------------|--------------|
| 930 | C  | 3.121761000        | -1.953937000 | 0.433918000  |
| 931 | C  | 3.533185000        | -0.835455000 | 1.230075000  |
| 932 | C  | 3.624577000        | 0.282385000  | 0.294823000  |
| 933 | O  | 3.661493000        | -0.187748000 | -1.010355000 |
| 934 | H  | 3.455099000        | -2.148717000 | -1.768291000 |
| 935 | H  | 3.158554000        | -3.006843000 | 0.721688000  |
| 936 | H  | 3.922710000        | -0.839436000 | 2.249788000  |
| 937 | C  | 3.417031000        | 1.662737000  | 0.518530000  |
| 938 | H  | 3.490006000        | 2.047991000  | 1.544985000  |
| 939 | O  | 3.273671000        | 2.545154000  | -0.521159000 |
| 940 | H  | 1.968905000        | 2.876055000  | -0.484452000 |
| 941 | H  | -2.194594000       | 2.450353000  | 1.037088000  |
| 942 | c. | IM1                |              |              |
| 943 |    | E+ZPE=-2545.694675 |              |              |
| 944 |    | G=-2545.739019     |              |              |
| 945 | Ni | 1.036463000        | -0.647495000 | 2.232653000  |
| 946 | Ni | -0.267028000       | 1.410153000  | 1.771336000  |
| 947 | Ni | -1.668911000       | 1.053715000  | -0.310288000 |
| 948 | Ni | -1.119455000       | -1.360373000 | -1.181479000 |
| 949 | Ni | 0.535162000        | -2.325662000 | 0.447092000  |
| 950 | Ni | 2.546371000        | -0.933346000 | 0.329280000  |
| 951 | Ni | 2.101530000        | 1.323413000  | 1.136942000  |
| 952 | Ni | 0.495164000        | 2.316507000  | -0.438460000 |
| 953 | Ni | -0.015762000       | 0.659849000  | -2.208544000 |
| 954 | Ni | 1.302514000        | -1.382627000 | -1.742331000 |

|     |    |                    |              |              |
|-----|----|--------------------|--------------|--------------|
| 955 | Ni | 2.245175000        | 0.878646000  | -1.291615000 |
| 956 | Ni | 0.403960000        | 0.012929000  | 0.007402000  |
| 957 | Ni | -1.293939000       | -0.884512000 | 1.404843000  |
| 958 | C  | -3.017617000       | -1.673146000 | 0.941800000  |
| 959 | C  | -2.896144000       | -2.118244000 | -0.455715000 |
| 960 | C  | -3.145281000       | -0.979927000 | -1.301196000 |
| 961 | C  | -3.484294000       | 0.124419000  | -0.392250000 |
| 962 | O  | -3.713799000       | -0.384268000 | 0.898592000  |
| 963 | H  | -3.480972000       | -2.324488000 | 1.696802000  |
| 964 | H  | -2.944773000       | -3.170914000 | -0.750003000 |
| 965 | H  | -3.448314000       | -0.996099000 | -2.351454000 |
| 966 | C  | -3.587192000       | 1.534407000  | -0.598915000 |
| 967 | H  | -3.811282000       | 1.904991000  | -1.606611000 |
| 968 | O  | -4.187471000       | 2.351417000  | 0.387103000  |
| 969 | H  | -3.808913000       | 2.044549000  | 1.236481000  |
| 970 | H  | 1.052729000        | 2.086212000  | -2.064416000 |
| 971 | d. | IM2                |              |              |
| 972 |    | E+ZPE=-2545.694190 |              |              |
| 973 |    | G=-2545.738020     |              |              |
| 974 | Ni | 0.927743000        | -0.289920000 | 2.326073000  |
| 975 | Ni | -0.238822000       | 1.724614000  | 1.475313000  |
| 976 | Ni | -1.591185000       | 1.098016000  | -0.570948000 |
| 977 | Ni | -1.176268000       | -1.455263000 | -0.998301000 |
| 978 | Ni | 0.374765000        | -2.216546000 | 0.828058000  |
| 979 | Ni | 2.468256000        | -0.979920000 | 0.555142000  |

|      |    |                    |              |              |
|------|----|--------------------|--------------|--------------|
| 980  | Ni | 2.140595000        | 1.402588000  | 0.955490000  |
| 981  | Ni | 0.632031000        | 2.220789000  | -0.818839000 |
| 982  | Ni | 0.081028000        | 0.295539000  | -2.312644000 |
| 983  | Ni | 1.261102000        | -1.702083000 | -1.451414000 |
| 984  | Ni | 2.338348000        | 0.535812000  | -1.361354000 |
| 985  | Ni | 0.399567000        | 0.017589000  | -0.004945000 |
| 986  | Ni | -1.385605000       | -0.534382000 | 1.458882000  |
| 987  | C  | -2.963062000       | -1.654169000 | 1.011631000  |
| 988  | C  | -2.948382000       | -2.179291000 | -0.349768000 |
| 989  | C  | -3.152564000       | -1.059880000 | -1.240645000 |
| 990  | C  | -3.387961000       | 0.110456000  | -0.394099000 |
| 991  | O  | -3.528833000       | -0.313940000 | 0.960974000  |
| 992  | H  | -3.359675000       | -2.219186000 | 1.864910000  |
| 993  | H  | -3.087129000       | -3.237139000 | -0.588261000 |
| 994  | H  | -3.481150000       | -1.102576000 | -2.281947000 |
| 995  | C  | -3.545902000       | 1.500926000  | -0.678626000 |
| 996  | H  | -3.916388000       | 1.805104000  | -1.664433000 |
| 997  | O  | -4.005355000       | 2.368157000  | 0.336303000  |
| 998  | H  | -3.415345000       | 2.191152000  | 1.101718000  |
| 999  | H  | -0.963150000       | 2.549352000  | -1.155477000 |
| 1000 | e. | TS2                |              |              |
| 1001 |    | E+ZPE=-2545.670093 |              |              |
| 1002 |    | G=-2545.714072     |              |              |
| 1003 | Ni | 1.011228000        | -0.369745000 | 2.296601000  |
| 1004 | Ni | -0.212808000       | 1.656543000  | 1.562489000  |

|      |        |              |              |              |
|------|--------|--------------|--------------|--------------|
| 1005 | Ni     | -1.614120000 | 1.089406000  | -0.468260000 |
| 1006 | Ni     | -1.169375000 | -1.436979000 | -1.011584000 |
| 1007 | Ni     | 0.446657000  | -2.243820000 | 0.737401000  |
| 1008 | Ni     | 2.510575000  | -0.960189000 | 0.455723000  |
| 1009 | Ni     | 2.155336000  | 1.398014000  | 0.962407000  |
| 1010 | Ni     | 0.582252000  | 2.260363000  | -0.733179000 |
| 1011 | Ni     | 0.019888000  | 0.387653000  | -2.288116000 |
| 1012 | Ni     | 1.257440000  | -1.621866000 | -1.543345000 |
| 1013 | Ni     | 2.299643000  | 0.629183000  | -1.392652000 |
| 1014 | Ni     | 0.410121000  | 0.022254000  | -0.003657000 |
| 1015 | Ni     | -1.322023000 | -0.620056000 | 1.486779000  |
| 1016 | C      | -2.962835000 | -1.662909000 | 1.030358000  |
| 1017 | C      | -2.925430000 | -2.192292000 | -0.333808000 |
| 1018 | C      | -3.181284000 | -1.087838000 | -1.231944000 |
| 1019 | C      | -3.409113000 | 0.071411000  | -0.390512000 |
| 1020 | O      | -3.558988000 | -0.330871000 | 0.948854000  |
| 1021 | H      | -3.405293000 | -2.231299000 | 1.859654000  |
| 1022 | H      | -3.035499000 | -3.255227000 | -0.565863000 |
| 1023 | H      | -3.486614000 | -1.136187000 | -2.279559000 |
| 1024 | C      | -3.597660000 | 1.493662000  | -0.672036000 |
| 1025 | H      | -4.069868000 | 1.718572000  | -1.637275000 |
| 1026 | O      | -4.198541000 | 2.262279000  | 0.348644000  |
| 1027 | H      | -3.658283000 | 2.085049000  | 1.148386000  |
| 1028 | H      | -2.321064000 | 2.294292000  | -1.014668000 |
| 1029 | f. FOL |              |              |              |

|      |                    |              |              |              |
|------|--------------------|--------------|--------------|--------------|
| 1030 | E+ZPE=-2545.680850 |              |              |              |
| 1031 | G=-2545.726073     |              |              |              |
| 1032 | Ni                 | -1.630469000 | -1.342136000 | -1.583820000 |
| 1033 | Ni                 | -0.103615000 | 0.480408000  | -2.285811000 |
| 1034 | Ni                 | 1.729645000  | 0.736937000  | -0.562245000 |
| 1035 | Ni                 | 1.249276000  | -1.026020000 | 1.321688000  |
| 1036 | Ni                 | -0.824723000 | -2.251220000 | 0.603550000  |
| 1037 | Ni                 | -2.637659000 | -0.609546000 | 0.521263000  |
| 1038 | Ni                 | -2.245304000 | 1.046672000  | -1.224577000 |
| 1039 | Ni                 | -0.221916000 | 2.301875000  | -0.571771000 |
| 1040 | Ni                 | 0.580214000  | 1.391196000  | 1.612361000  |
| 1041 | Ni                 | -0.961120000 | -0.418514000 | 2.297529000  |
| 1042 | Ni                 | -1.828615000 | 1.610952000  | 1.155884000  |
| 1043 | Ni                 | -0.421108000 | 0.019098000  | -0.006341000 |
| 1044 | Ni                 | 0.808630000  | -1.622591000 | -1.202805000 |
| 1045 | C                  | 2.735701000  | -1.851710000 | -0.925105000 |
| 1046 | C                  | 2.823527000  | -2.142819000 | 0.510911000  |
| 1047 | C                  | 3.269791000  | -0.954988000 | 1.187626000  |
| 1048 | C                  | 3.463730000  | 0.074284000  | 0.168624000  |
| 1049 | O                  | 3.413174000  | -0.564796000 | -1.120599000 |
| 1050 | H                  | 3.105458000  | -2.570892000 | -1.676040000 |
| 1051 | H                  | 2.846501000  | -3.160859000 | 0.906373000  |
| 1052 | H                  | 3.715674000  | -0.895185000 | 2.185109000  |
| 1053 | C                  | 4.433696000  | 1.219674000  | 0.285116000  |
| 1054 | H                  | 5.405790000  | 0.966776000  | -0.177707000 |

|      |                                               |              |              |              |
|------|-----------------------------------------------|--------------|--------------|--------------|
| 1055 | O                                             | 3.981144000  | 2.425374000  | -0.364869000 |
| 1056 | H                                             | 2.994885000  | 2.444299000  | -0.181982000 |
| 1057 | H                                             | 4.607902000  | 1.385483000  | 1.367615000  |
| 1058 | 5. CPO to CPOL on neutral Ni cluster (path a) |              |              |              |
| 1059 | a. Ni + CPO+2H                                |              |              |              |
| 1060 | E+ZPE=-2472.824296                            |              |              |              |
| 1061 | G=-2472.869355                                |              |              |              |
| 1062 | Ni                                            | 2.013125000  | 1.885071000  | -0.091137000 |
| 1063 | Ni                                            | 1.479338000  | 0.699183000  | 2.050948000  |
| 1064 | Ni                                            | 1.040571000  | -1.704674000 | 1.533619000  |
| 1065 | Ni                                            | 1.306909000  | -2.044028000 | -0.934876000 |
| 1066 | Ni                                            | 1.889228000  | 0.185329000  | -1.932384000 |
| 1067 | Ni                                            | 0.009761000  | 1.784446000  | -1.507134000 |
| 1068 | Ni                                            | -0.275460000 | 2.081449000  | 0.918589000  |
| 1069 | Ni                                            | -0.802871000 | -0.151755000 | 1.886412000  |
| 1070 | Ni                                            | -0.984419000 | -1.843167000 | 0.071393000  |
| 1071 | Ni                                            | -0.441590000 | -0.717491000 | -2.046600000 |
| 1072 | Ni                                            | -1.784694000 | 0.494413000  | -0.319514000 |
| 1073 | Ni                                            | 0.500846000  | 0.036125000  | -0.048724000 |
| 1074 | Ni                                            | 2.765114000  | -0.457706000 | 0.323579000  |
| 1075 | C                                             | -3.758584000 | 0.077351000  | -1.224253000 |
| 1076 | C                                             | -4.208757000 | -0.328636000 | 1.184462000  |
| 1077 | C                                             | -4.810381000 | 1.017993000  | 0.752965000  |
| 1078 | C                                             | -5.010476000 | 0.852955000  | -0.769536000 |
| 1079 | H                                             | -2.947666000 | 0.872113000  | -1.548900000 |

|      |                    |              |              |              |
|------|--------------------|--------------|--------------|--------------|
| 1080 | H                  | -3.856143000 | -0.536624000 | -2.132670000 |
| 1081 | H                  | -5.002538000 | -1.091631000 | 1.321841000  |
| 1082 | H                  | -3.617935000 | -0.285534000 | 2.116640000  |
| 1083 | H                  | -5.741437000 | 1.277116000  | 1.281444000  |
| 1084 | H                  | -4.071569000 | 1.819915000  | 0.937296000  |
| 1085 | H                  | -5.903259000 | 0.231461000  | -0.965555000 |
| 1086 | H                  | -5.144532000 | 1.812360000  | -1.295820000 |
| 1087 | C                  | -3.339588000 | -0.750600000 | -0.004543000 |
| 1088 | O                  | -2.894182000 | -1.999093000 | -0.083232000 |
| 1089 | H                  | -1.685522000 | 1.236199000  | 1.341501000  |
| 1090 | H                  | -0.153214000 | -1.478480000 | 2.658685000  |
| 1091 | b. TS1             |              |              |              |
| 1092 | E+ZPE=-2472.791785 |              |              |              |
| 1093 | G=-2472.837718     |              |              |              |
| 1094 | Ni                 | 2.071418000  | 1.825747000  | 0.348066000  |
| 1095 | Ni                 | 1.452755000  | 0.227164000  | 2.175922000  |
| 1096 | Ni                 | 0.990194000  | -2.002784000 | 1.150270000  |
| 1097 | Ni                 | 1.321372000  | -1.818266000 | -1.325784000 |
| 1098 | Ni                 | 1.972493000  | 0.556215000  | -1.813972000 |
| 1099 | Ni                 | 0.110069000  | 2.073392000  | -1.108359000 |
| 1100 | Ni                 | -0.242508000 | 1.858510000  | 1.317019000  |
| 1101 | Ni                 | -0.844584000 | -0.514239000 | 1.778965000  |
| 1102 | Ni                 | -0.995657000 | -1.781578000 | -0.357812000 |
| 1103 | Ni                 | -0.370297000 | -0.248020000 | -2.176224000 |
| 1104 | Ni                 | -1.738356000 | 0.606675000  | -0.267357000 |



|      |                    |              |              |              |
|------|--------------------|--------------|--------------|--------------|
| 1105 | Ni                 | 0.525535000  | 0.044492000  | -0.040443000 |
| 1106 | Ni                 | 2.768483000  | -0.568987000 | 0.276205000  |
| 1107 | C                  | -3.806524000 | 0.264169000  | -1.152720000 |
| 1108 | C                  | -4.662778000 | -0.596940000 | 0.989473000  |
| 1109 | C                  | -5.159373000 | 0.841381000  | 0.813357000  |
| 1110 | C                  | -5.054690000 | 1.066579000  | -0.712825000 |
| 1111 | H                  | -2.979580000 | 0.987540000  | -1.516444000 |
| 1112 | H                  | -3.961261000 | -0.376226000 | -2.035668000 |
| 1113 | H                  | -5.413060000 | -1.318736000 | 0.611300000  |
| 1114 | H                  | -4.410820000 | -0.873877000 | 2.026339000  |
| 1115 | H                  | -6.175992000 | 1.008661000  | 1.202409000  |
| 1116 | H                  | -4.476080000 | 1.532281000  | 1.342750000  |
| 1117 | H                  | -5.948928000 | 0.651214000  | -1.209620000 |
| 1118 | H                  | -4.994394000 | 2.133273000  | -0.982857000 |
| 1119 | C                  | -3.434633000 | -0.670923000 | 0.050804000  |
| 1120 | O                  | -2.913273000 | -1.894233000 | -0.217155000 |
| 1121 | H                  | -2.612615000 | -0.029324000 | 0.940626000  |
| 1122 | H                  | 0.401200000  | -1.219585000 | 2.648010000  |
| 1123 | c. IM1             |              |              |              |
| 1124 | E+ZPE=-2472.789316 |              |              |              |
| 1125 | G=-2472.837212     |              |              |              |
| 1126 | Ni                 | 2.521497000  | 1.374801000  | 0.457590000  |
| 1127 | Ni                 | 2.009143000  | -0.697368000 | 1.770037000  |
| 1128 | Ni                 | 0.865920000  | -2.324955000 | 0.259315000  |
| 1129 | Ni                 | 0.659190000  | -1.286315000 | -2.010772000 |

|      |    |              |              |              |
|------|----|--------------|--------------|--------------|
| 1130 | Ni | 1.669559000  | 1.007179000  | -1.873943000 |
| 1131 | Ni | 0.379602000  | 2.367710000  | -0.216308000 |
| 1132 | Ni | 0.547623000  | 1.322753000  | 2.005110000  |
| 1133 | Ni | -0.422000000 | -0.965910000 | 1.830469000  |
| 1134 | Ni | -1.317000000 | -1.334572000 | -0.463571000 |
| 1135 | Ni | -0.810061000 | 0.673726000  | -1.788557000 |
| 1136 | Ni | -1.498015000 | 0.925865000  | 0.603254000  |
| 1137 | Ni | 0.587307000  | 0.055368000  | -0.022729000 |
| 1138 | Ni | 2.661791000  | -0.891225000 | -0.577581000 |
| 1139 | C  | -4.387233000 | 0.434667000  | -1.081621000 |
| 1140 | C  | -5.199395000 | -0.850879000 | 0.782774000  |
| 1141 | C  | -5.979605000 | 0.486267000  | 0.808129000  |
| 1142 | C  | -5.384502000 | 1.354302000  | -0.353813000 |
| 1143 | H  | -3.540805000 | 0.971207000  | -1.555389000 |
| 1144 | H  | -4.888000000 | -0.170741000 | -1.861552000 |
| 1145 | H  | -5.741399000 | -1.615972000 | 0.194523000  |
| 1146 | H  | -5.010846000 | -1.273667000 | 1.783848000  |
| 1147 | H  | -7.062901000 | 0.324354000  | 0.687139000  |
| 1148 | H  | -5.844517000 | 1.000318000  | 1.775020000  |
| 1149 | H  | -6.163883000 | 1.749700000  | -1.025154000 |
| 1150 | H  | -4.850233000 | 2.225911000  | 0.064827000  |
| 1151 | C  | -3.894770000 | -0.526186000 | 0.020780000  |
| 1152 | O  | -3.164493000 | -1.631671000 | -0.401797000 |
| 1153 | H  | -3.278612000 | 0.118677000  | 0.759438000  |
| 1154 | H  | 0.842632000  | -2.023034000 | 2.109393000  |

|      |                    |              |              |              |
|------|--------------------|--------------|--------------|--------------|
| 1155 | d. IM2             |              |              |              |
| 1156 | E+ZPE=-2472.789780 |              |              |              |
| 1157 | G=-2472.837783     |              |              |              |
| 1158 | Ni                 | -2.604223000 | 1.319424000  | -0.113158000 |
| 1159 | Ni                 | -2.649939000 | -1.176898000 | 0.099095000  |
| 1160 | Ni                 | -0.653385000 | -1.893418000 | 1.417389000  |
| 1161 | Ni                 | 0.652297000  | 0.148766000  | 2.045548000  |
| 1162 | Ni                 | -0.550294000 | 2.128844000  | 1.080093000  |
| 1163 | Ni                 | -0.606858000 | 1.911785000  | -1.412654000 |
| 1164 | Ni                 | -1.853169000 | -0.117963000 | -2.027806000 |
| 1165 | Ni                 | -0.664156000 | -2.062229000 | -1.019990000 |
| 1166 | Ni                 | 1.406122000  | -1.285042000 | 0.127144000  |
| 1167 | Ni                 | 1.471416000  | 1.166082000  | -0.040505000 |
| 1168 | Ni                 | 0.657331000  | -0.174455000 | -1.986745000 |
| 1169 | Ni                 | -0.581554000 | 0.050048000  | -0.010425000 |
| 1170 | Ni                 | -1.838761000 | 0.174537000  | 1.967703000  |
| 1171 | C                  | 3.805862000  | 0.852860000  | -0.157981000 |
| 1172 | C                  | 5.565530000  | -0.851850000 | -0.379907000 |
| 1173 | C                  | 6.012594000  | 0.272036000  | 0.575011000  |
| 1174 | C                  | 5.188643000  | 1.483111000  | 0.097256000  |
| 1175 | H                  | 3.207190000  | 1.448977000  | -0.906520000 |
| 1176 | H                  | 3.262112000  | 0.785454000  | 0.821887000  |
| 1177 | H                  | 5.738946000  | -1.866465000 | 0.014484000  |
| 1178 | H                  | 6.119098000  | -0.765057000 | -1.332944000 |
| 1179 | H                  | 5.729458000  | 0.023973000  | 1.615210000  |

|      |    |                    |              |              |
|------|----|--------------------|--------------|--------------|
| 1180 | H  | 7.100144000        | 0.452501000  | 0.561625000  |
| 1181 | H  | 5.154321000        | 2.311528000  | 0.824642000  |
| 1182 | H  | 5.613033000        | 1.881240000  | -0.843265000 |
| 1183 | C  | 4.041472000        | -0.622895000 | -0.638481000 |
| 1184 | O  | 3.242951000        | -1.574067000 | 0.031702000  |
| 1185 | H  | 3.838605000        | -0.669269000 | -1.734272000 |
| 1186 | H  | -0.566276000       | -3.115352000 | 0.230845000  |
| 1187 | e. | TS2                |              |              |
| 1188 |    | E+ZPE=-2472.752983 |              |              |
| 1189 |    | G=-2472.802588     |              |              |
| 1190 | Ni | -2.892752000       | 0.031029000  | -0.827654000 |
| 1191 | Ni | -1.714508000       | -2.096019000 | -0.223165000 |
| 1192 | Ni | -0.135205000       | -1.617805000 | 1.651701000  |
| 1193 | Ni | -0.318300000       | 0.809568000  | 2.238419000  |
| 1194 | Ni | -2.011474000       | 1.825348000  | 0.689228000  |
| 1195 | Ni | -1.199209000       | 1.598167000  | -1.667348000 |
| 1196 | Ni | -0.979162000       | -0.787123000 | -2.228535000 |
| 1197 | Ni | 0.673381000        | -1.779121000 | -0.649162000 |
| 1198 | Ni | 1.597087000        | -0.003794000 | 0.834035000  |
| 1199 | Ni | 0.444823000        | 2.096248000  | 0.283957000  |
| 1200 | Ni | 1.058843000        | 0.517546000  | -1.553830000 |
| 1201 | Ni | -0.645357000       | 0.050418000  | -0.013969000 |
| 1202 | Ni | -2.313351000       | -0.510419000 | 1.538453000  |
| 1203 | C  | 4.408932000        | 1.088550000  | -0.223418000 |
| 1204 | C  | 5.499481000        | -1.105740000 | -0.483661000 |

|      |                    |              |              |              |
|------|--------------------|--------------|--------------|--------------|
| 1205 | C                  | 6.407594000  | -0.182876000 | 0.347359000  |
| 1206 | C                  | 5.946126000  | 1.220490000  | -0.093611000 |
| 1207 | H                  | 3.988800000  | 1.697918000  | -1.043617000 |
| 1208 | H                  | 3.890288000  | 1.406657000  | 0.700480000  |
| 1209 | H                  | 5.454859000  | -2.148339000 | -0.128755000 |
| 1210 | H                  | 5.853317000  | -1.121109000 | -1.532288000 |
| 1211 | H                  | 6.204543000  | -0.327083000 | 1.424830000  |
| 1212 | H                  | 7.483905000  | -0.358360000 | 0.184453000  |
| 1213 | H                  | 6.252867000  | 2.019792000  | 0.601375000  |
| 1214 | H                  | 6.391606000  | 1.455654000  | -1.077745000 |
| 1215 | C                  | 4.106779000  | -0.432223000 | -0.421114000 |
| 1216 | O                  | 3.342019000  | -0.963908000 | 0.668105000  |
| 1217 | H                  | 3.531303000  | -0.600187000 | -1.361524000 |
| 1218 | H                  | 2.184024000  | -1.596130000 | 0.114994000  |
| 1219 | f. CPOL            |              |              |              |
| 1220 | E+ZPE=-2472.764041 |              |              |              |
| 1221 | G=-2472.812995     |              |              |              |
| 1222 | Ni                 | 2.981814000  | 0.395503000  | 0.473193000  |
| 1223 | Ni                 | 1.789724000  | -1.668653000 | 1.245273000  |
| 1224 | Ni                 | 0.032415000  | -2.239985000 | -0.435073000 |
| 1225 | Ni                 | 0.116233000  | -0.542026000 | -2.273473000 |
| 1226 | Ni                 | 1.929673000  | 1.093815000  | -1.695335000 |
| 1227 | Ni                 | 1.347460000  | 2.227968000  | 0.458601000  |
| 1228 | Ni                 | 1.223691000  | 0.552529000  | 2.255917000  |
| 1229 | Ni                 | -0.552562000 | -1.081579000 | 1.636044000  |

|      |    |              |              |              |
|------|----|--------------|--------------|--------------|
| 1230 | Ni | -1.643467000 | -0.378915000 | -0.490238000 |
| 1231 | Ni | -0.481854000 | 1.633675000  | -1.290370000 |
| 1232 | Ni | -0.891703000 | 1.347159000  | 1.158451000  |
| 1233 | Ni | 0.667806000  | 0.048093000  | -0.014522000 |
| 1234 | Ni | 2.191524000  | -1.334023000 | -1.142781000 |
| 1235 | C  | -4.478349000 | 1.113274000  | 0.282652000  |
| 1236 | C  | -5.772286000 | -0.920304000 | 0.673274000  |
| 1237 | C  | -6.464612000 | -0.144120000 | -0.461586000 |
| 1238 | C  | -5.913093000 | 1.290213000  | -0.295218000 |
| 1239 | H  | -4.310091000 | 1.737623000  | 1.176017000  |
| 1240 | H  | -3.675443000 | 1.376280000  | -0.432524000 |
| 1241 | H  | -5.813575000 | -2.018057000 | 0.571309000  |
| 1242 | H  | -6.224943000 | -0.659941000 | 1.647782000  |
| 1243 | H  | -6.153759000 | -0.563575000 | -1.434444000 |
| 1244 | H  | -7.563986000 | -0.193096000 | -0.412542000 |
| 1245 | H  | -5.919712000 | 1.857114000  | -1.239984000 |
| 1246 | H  | -6.539620000 | 1.849183000  | 0.421005000  |
| 1247 | C  | -4.339226000 | -0.377029000 | 0.650951000  |
| 1248 | O  | -3.583563000 | -1.019299000 | -0.446697000 |
| 1249 | H  | -3.767171000 | -0.541789000 | 1.581937000  |
| 1250 | H  | -3.458962000 | -1.961300000 | -0.204649000 |

1251 6. CPO to CPO<sub>L</sub> on neutral Ni cluster (path b)

1252 a. Ni + CPO+2H

1253 E+ZPE=-2472.828914

1254 G=-2472.873489

|      |    |              |              |              |
|------|----|--------------|--------------|--------------|
| 1255 | Ni | -1.792377000 | 1.991221000  | 0.375458000  |
| 1256 | Ni | -2.487982000 | 0.197911000  | -1.230834000 |
| 1257 | Ni | -1.661034000 | -1.996962000 | -0.370391000 |
| 1258 | Ni | -0.447033000 | -1.593292000 | 1.783515000  |
| 1259 | Ni | -0.518119000 | 0.876114000  | 2.227223000  |
| 1260 | Ni | 0.661949000  | 2.071779000  | 0.370904000  |
| 1261 | Ni | -0.507395000 | 1.638982000  | -1.750337000 |
| 1262 | Ni | -0.459135000 | -0.819412000 | -2.144626000 |
| 1263 | Ni | 0.841702000  | -1.939925000 | -0.343587000 |
| 1264 | Ni | 1.521937000  | -0.213377000 | 1.267984000  |
| 1265 | Ni | 1.546416000  | 0.312588000  | -1.176565000 |
| 1266 | Ni | -0.442322000 | 0.048351000  | 0.034804000  |
| 1267 | Ni | -2.472372000 | -0.275362000 | 1.167052000  |
| 1268 | C  | 3.725032000  | -0.292674000 | 1.204282000  |
| 1269 | C  | 3.743301000  | 0.034074000  | -1.268085000 |
| 1270 | C  | 4.834696000  | 0.892821000  | -0.592336000 |
| 1271 | C  | 4.365475000  | 1.061922000  | 0.866500000  |
| 1272 | H  | 3.048783000  | -0.211006000 | 2.144661000  |
| 1273 | H  | 4.456371000  | -1.061736000 | 1.514034000  |
| 1274 | H  | 4.117880000  | -0.662684000 | -2.033992000 |
| 1275 | H  | 3.057212000  | 0.760065000  | -1.876666000 |
| 1276 | H  | 5.783173000  | 0.327053000  | -0.612109000 |
| 1277 | H  | 5.009904000  | 1.855914000  | -1.098307000 |
| 1278 | H  | 5.181509000  | 1.342069000  | 1.551362000  |
| 1279 | H  | 3.582086000  | 1.840755000  | 0.921453000  |

|      |                    |              |              |              |
|------|--------------------|--------------|--------------|--------------|
| 1280 | C                  | 3.063576000  | -0.750960000 | -0.122832000 |
| 1281 | O                  | 2.756860000  | -2.053913000 | -0.298128000 |
| 1282 | H                  | 0.531936000  | 0.514690000  | -2.637918000 |
| 1283 | H                  | -1.174824000 | -2.306106000 | -1.909492000 |
| 1284 | b. TS1             |              |              |              |
| 1285 | E+ZPE=-2472.766882 |              |              |              |
| 1286 | G=-2472.811192     |              |              |              |
| 1287 | Ni                 | 1.738385000  | -2.022772000 | 0.390399000  |
| 1288 | Ni                 | 2.555771000  | -0.205961000 | -1.129942000 |
| 1289 | Ni                 | 1.731843000  | 1.984810000  | -0.256553000 |
| 1290 | Ni                 | 0.397893000  | 1.555118000  | 1.820046000  |
| 1291 | Ni                 | 0.392807000  | -0.925598000 | 2.202058000  |
| 1292 | Ni                 | -0.713277000 | -2.047380000 | 0.256162000  |
| 1293 | Ni                 | 0.575017000  | -1.588726000 | -1.789444000 |
| 1294 | Ni                 | 0.599938000  | 0.879708000  | -2.121105000 |
| 1295 | Ni                 | -0.769485000 | 1.984082000  | -0.360992000 |
| 1296 | Ni                 | -1.570327000 | 0.232439000  | 1.166478000  |
| 1297 | Ni                 | -1.477545000 | -0.229089000 | -1.288453000 |
| 1298 | Ni                 | 0.450160000  | -0.041645000 | 0.030895000  |
| 1299 | Ni                 | 2.424243000  | 0.207225000  | 1.275474000  |
| 1300 | C                  | -3.763737000 | 0.458768000  | 1.162425000  |
| 1301 | C                  | -3.772247000 | -0.199512000 | -1.231614000 |
| 1302 | C                  | -4.736479000 | -1.116636000 | -0.437488000 |
| 1303 | C                  | -4.352314000 | -0.960076000 | 1.053131000  |
| 1304 | H                  | -3.086365000 | 0.564646000  | 2.096649000  |



|      |    |                    |              |              |
|------|----|--------------------|--------------|--------------|
| 1305 | H  | -4.518898000       | 1.249196000  | 1.333526000  |
| 1306 | H  | -4.292972000       | 0.449630000  | -1.955211000 |
| 1307 | H  | -3.073542000       | -0.836741000 | -1.890030000 |
| 1308 | H  | -5.767694000       | -0.758084000 | -0.596685000 |
| 1309 | H  | -4.702349000       | -2.167738000 | -0.765450000 |
| 1310 | H  | -5.205211000       | -1.124680000 | 1.731163000  |
| 1311 | H  | -3.561440000       | -1.686495000 | 1.317067000  |
| 1312 | C  | -3.059947000       | 0.677285000  | -0.183822000 |
| 1313 | O  | -2.830512000       | 2.018209000  | -0.585258000 |
| 1314 | H  | -0.558484000       | -0.587818000 | -2.695890000 |
| 1315 | H  | -1.872447000       | 1.691565000  | -1.529547000 |
| 1316 | c. | IM1                |              |              |
| 1317 |    | E+ZPE=-2472.784056 |              |              |
| 1318 |    | G=-2472.828451     |              |              |
| 1319 | Ni | 1.794608000        | -1.964486000 | 0.484408000  |
| 1320 | Ni | 2.470940000        | -0.301033000 | -1.263278000 |
| 1321 | Ni | 1.682978000        | 1.958792000  | -0.547616000 |
| 1322 | Ni | 0.513075000        | 1.727563000  | 1.654768000  |
| 1323 | Ni | 0.571865000        | -0.703667000 | 2.276270000  |
| 1324 | Ni | -0.659690000       | -2.019079000 | 0.538137000  |
| 1325 | Ni | 0.466094000        | -1.755788000 | -1.633659000 |
| 1326 | Ni | 0.432106000        | 0.668505000  | -2.205796000 |
| 1327 | Ni | -0.818807000       | 1.932406000  | -0.464991000 |
| 1328 | Ni | -1.478980000       | 0.333306000  | 1.283513000  |
| 1329 | Ni | -1.562814000       | -0.366778000 | -1.113747000 |

|      |                    |              |              |              |
|------|--------------------|--------------|--------------|--------------|
| 1330 | Ni                 | 0.455644000  | -0.037108000 | 0.030408000  |
| 1331 | Ni                 | 2.512620000  | 0.346309000  | 1.093205000  |
| 1332 | C                  | -3.741678000 | 0.314390000  | 1.206077000  |
| 1333 | C                  | -3.782146000 | -0.121057000 | -1.228397000 |
| 1334 | C                  | -4.715198000 | -1.121978000 | -0.501172000 |
| 1335 | C                  | -4.262777000 | -1.115370000 | 0.976691000  |
| 1336 | H                  | -3.097858000 | 0.378081000  | 2.157702000  |
| 1337 | H                  | -4.549439000 | 1.047586000  | 1.391211000  |
| 1338 | H                  | -4.338427000 | 0.584700000  | -1.873397000 |
| 1339 | H                  | -3.101966000 | -0.650652000 | -1.999612000 |
| 1340 | H                  | -5.753765000 | -0.756765000 | -0.575477000 |
| 1341 | H                  | -4.685784000 | -2.129979000 | -0.943821000 |
| 1342 | H                  | -5.067231000 | -1.395962000 | 1.674805000  |
| 1343 | H                  | -3.419333000 | -1.817821000 | 1.117666000  |
| 1344 | C                  | -3.030708000 | 0.642312000  | -0.114454000 |
| 1345 | O                  | -2.940786000 | 2.101388000  | -0.354345000 |
| 1346 | H                  | -0.696112000 | -0.846856000 | -2.543446000 |
| 1347 | H                  | -3.198674000 | 2.256375000  | -1.288727000 |
| 1348 | d. IM2             |              |              |              |
| 1349 | E+ZPE=-2472.768054 |              |              |              |
| 1350 | G=-2472.814057     |              |              |              |
| 1351 | Ni                 | -2.030948000 | 1.899766000  | 0.002096000  |
| 1352 | Ni                 | -1.867326000 | 0.329289000  | -1.943267000 |
| 1353 | Ni                 | -1.322151000 | -1.947901000 | -1.074292000 |
| 1354 | Ni                 | -1.146186000 | -1.820027000 | 1.421386000  |

|      |    |              |              |              |
|------|----|--------------|--------------|--------------|
| 1355 | Ni | -1.568341000 | 0.565822000  | 2.075856000  |
| 1356 | Ni | 0.190410000  | 2.017064000  | 1.041946000  |
| 1357 | Ni | 0.043275000  | 1.855784000  | -1.409503000 |
| 1358 | Ni | 0.423654000  | -0.527162000 | -2.026992000 |
| 1359 | Ni | 0.932137000  | -1.863782000 | 0.011489000  |
| 1360 | Ni | 0.757025000  | -0.353752000 | 1.946591000  |
| 1361 | Ni | 1.758739000  | 0.500872000  | -0.175858000 |
| 1362 | Ni | -0.528181000 | 0.030637000  | 0.035120000  |
| 1363 | Ni | -2.817990000 | -0.462690000 | 0.164564000  |
| 1364 | C  | 4.136171000  | -0.364230000 | 1.170575000  |
| 1365 | C  | 4.463681000  | -0.118503000 | -1.201649000 |
| 1366 | C  | 5.179322000  | 1.087763000  | -0.549640000 |
| 1367 | C  | 4.953582000  | 0.934687000  | 0.990946000  |
| 1368 | H  | 3.443674000  | -0.329648000 | 2.033440000  |
| 1369 | H  | 4.808091000  | -1.237035000 | 1.320750000  |
| 1370 | H  | 5.178446000  | -0.960436000 | -1.336325000 |
| 1371 | H  | 4.028400000  | 0.113104000  | -2.188937000 |
| 1372 | H  | 6.248702000  | 1.110891000  | -0.815230000 |
| 1373 | H  | 4.727460000  | 2.028394000  | -0.902802000 |
| 1374 | H  | 5.901873000  | 0.896569000  | 1.551407000  |
| 1375 | H  | 4.378460000  | 1.794383000  | 1.373002000  |
| 1376 | C  | 3.414256000  | -0.519252000 | -0.166453000 |
| 1377 | O  | 3.004687000  | -1.946702000 | -0.333226000 |
| 1378 | H  | 2.354176000  | 1.854680000  | -0.465519000 |
| 1379 | H  | 2.935848000  | -2.089850000 | -1.302489000 |

|      |    |                    |              |              |
|------|----|--------------------|--------------|--------------|
| 1380 | e. | TS2                |              |              |
| 1381 |    | E+ZPE=-2472.748401 |              |              |
| 1382 |    | G=-2472.794421     |              |              |
| 1383 | Ni | 2.054586000        | -1.851547000 | -0.424579000 |
| 1384 | Ni | 1.979812000        | 0.171767000  | -1.900450000 |
| 1385 | Ni | 1.391956000        | 2.151129000  | -0.495290000 |
| 1386 | Ni | 1.100102000        | 1.381730000  | 1.870833000  |
| 1387 | Ni | 1.494256000        | -1.096682000 | 1.901382000  |
| 1388 | Ni | -0.212652000       | -2.210501000 | 0.447391000  |
| 1389 | Ni | 0.048288000        | -1.420035000 | -1.868728000 |
| 1390 | Ni | -0.305841000       | 1.045551000  | -1.862461000 |
| 1391 | Ni | -0.910426000       | 1.812660000  | 0.428131000  |
| 1392 | Ni | -0.823697000       | -0.149744000 | 1.910284000  |
| 1393 | Ni | -1.724342000       | -0.413126000 | -0.404477000 |
| 1394 | Ni | 0.549609000        | -0.038776000 | 0.024832000  |
| 1395 | Ni | 2.830295000        | 0.379021000  | 0.381585000  |
| 1396 | C  | -4.054201000       | -0.014866000 | 1.178587000  |
| 1397 | C  | -4.871419000       | 0.478274000  | -1.017207000 |
| 1398 | C  | -5.568975000       | -0.836602000 | -0.604368000 |
| 1399 | C  | -5.053975000       | -1.143468000 | 0.840637000  |
| 1400 | H  | -3.232185000       | -0.349768000 | 1.842848000  |
| 1401 | H  | -4.558219000       | 0.837707000  | 1.675297000  |
| 1402 | H  | -5.465684000       | 1.354330000  | -0.693316000 |
| 1403 | H  | -4.697695000       | 0.565174000  | -2.103064000 |
| 1404 | H  | -6.664896000       | -0.741131000 | -0.650719000 |

|      |    |                    |              |              |
|------|----|--------------------|--------------|--------------|
| 1405 | H  | -5.286639000       | -1.652253000 | -1.291272000 |
| 1406 | H  | -5.872061000       | -1.187699000 | 1.576536000  |
| 1407 | H  | -4.539944000       | -2.119239000 | 0.864429000  |
| 1408 | C  | -3.568486000       | 0.469283000  | -0.192873000 |
| 1409 | O  | -3.032823000       | 1.846772000  | -0.085878000 |
| 1410 | H  | -3.064625000       | -0.654818000 | -0.987749000 |
| 1411 | H  | -2.867639000       | 2.137309000  | -1.011320000 |
| 1412 | f. | CPOL               |              |              |
| 1413 |    | E+ZPE=-2472.764041 |              |              |
| 1414 |    | G=-2472.812995     |              |              |
| 1415 | Ni | 2.981814000        | 0.395503000  | 0.473193000  |
| 1416 | Ni | 1.789724000        | -1.668653000 | 1.245273000  |
| 1417 | Ni | 0.032415000        | -2.239985000 | -0.435073000 |
| 1418 | Ni | 0.116233000        | -0.542026000 | -2.273473000 |
| 1419 | Ni | 1.929673000        | 1.093815000  | -1.695335000 |
| 1420 | Ni | 1.347460000        | 2.227968000  | 0.458601000  |
| 1421 | Ni | 1.223691000        | 0.552529000  | 2.255917000  |
| 1422 | Ni | -0.552562000       | -1.081579000 | 1.636044000  |
| 1423 | Ni | -1.643467000       | -0.378915000 | -0.490238000 |
| 1424 | Ni | -0.481854000       | 1.633675000  | -1.290370000 |
| 1425 | Ni | -0.891703000       | 1.347159000  | 1.158451000  |
| 1426 | Ni | 0.667806000        | 0.048093000  | -0.014522000 |
| 1427 | Ni | 2.191524000        | -1.334023000 | -1.142781000 |
| 1428 | C  | -4.478349000       | 1.113274000  | 0.282652000  |
| 1429 | C  | -5.772286000       | -0.920304000 | 0.673274000  |

|      |   |              |              |              |
|------|---|--------------|--------------|--------------|
| 1430 | C | -6.464612000 | -0.144120000 | -0.461586000 |
| 1431 | C | -5.913093000 | 1.290213000  | -0.295218000 |
| 1432 | H | -4.310091000 | 1.737623000  | 1.176017000  |
| 1433 | H | -3.675443000 | 1.376280000  | -0.432524000 |
| 1434 | H | -5.813575000 | -2.018057000 | 0.571309000  |
| 1435 | H | -6.224943000 | -0.659941000 | 1.647782000  |
| 1436 | H | -6.153759000 | -0.563575000 | -1.434444000 |
| 1437 | H | -7.563986000 | -0.193096000 | -0.412542000 |
| 1438 | H | -5.919712000 | 1.857114000  | -1.239984000 |
| 1439 | H | -6.539620000 | 1.849183000  | 0.421005000  |
| 1440 | C | -4.339226000 | -0.377029000 | 0.650951000  |
| 1441 | O | -3.583563000 | -1.019299000 | -0.446697000 |
| 1442 | H | -3.767171000 | -0.541789000 | 1.581937000  |
| 1443 | H | -3.458962000 | -1.961300000 | -0.204649000 |

1444 7. CPO to CPO<sub>L</sub> on charged (-1) Ni cluster (path a)

1445 a. Ni + CPO+2H

1446 E+ZPE=-2472.923643

1447 G=-2472.969288

|      |    |              |              |              |
|------|----|--------------|--------------|--------------|
| 1448 | Ni | 2.797154000  | -0.678930000 | -0.180844000 |
| 1449 | Ni | 2.141102000  | 1.267033000  | 1.206956000  |
| 1450 | Ni | -0.173190000 | 0.872588000  | 2.148385000  |
| 1451 | Ni | -0.975008000 | -1.450869000 | 1.229902000  |
| 1452 | Ni | 0.908798000  | -2.323684000 | -0.178475000 |
| 1453 | Ni | 1.205899000  | -0.757030000 | -2.035805000 |
| 1454 | Ni | 1.964170000  | 1.418483000  | -1.238209000 |

|      |                    |              |              |              |
|------|--------------------|--------------|--------------|--------------|
| 1455 | Ni                 | 0.142676000  | 2.342851000  | 0.148999000  |
| 1456 | Ni                 | -1.737638000 | 0.694722000  | 0.149958000  |
| 1457 | Ni                 | -1.066492000 | -1.229020000 | -1.247459000 |
| 1458 | Ni                 | -0.406883000 | 1.079184000  | -1.886474000 |
| 1459 | Ni                 | 0.505461000  | 0.012604000  | 0.086748000  |
| 1460 | Ni                 | 1.537277000  | -1.090830000 | 1.920888000  |
| 1461 | C                  | -3.773917000 | 1.111317000  | -0.551003000 |
| 1462 | C                  | -4.167112000 | -1.117500000 | 0.500355000  |
| 1463 | C                  | -5.400728000 | -0.214139000 | 0.705973000  |
| 1464 | C                  | -4.852488000 | 1.221311000  | 0.549587000  |
| 1465 | H                  | -2.920514000 | 1.889471000  | -0.354409000 |
| 1466 | H                  | -4.104743000 | 1.398358000  | -1.563622000 |
| 1467 | H                  | -4.409379000 | -2.122527000 | 0.117960000  |
| 1468 | H                  | -3.606967000 | -1.240081000 | 1.447440000  |
| 1469 | H                  | -6.138420000 | -0.415517000 | -0.092248000 |
| 1470 | H                  | -5.907269000 | -0.373018000 | 1.672598000  |
| 1471 | H                  | -5.637595000 | 1.954523000  | 0.301531000  |
| 1472 | H                  | -4.376273000 | 1.547419000  | 1.491382000  |
| 1473 | C                  | -3.311680000 | -0.359486000 | -0.535718000 |
| 1474 | O                  | -2.936068000 | -0.995258000 | -1.648452000 |
| 1475 | H                  | -0.376463000 | -2.915981000 | 0.724024000  |
| 1476 | H                  | -1.611390000 | -0.008483000 | 1.939815000  |
| 1477 | b. TS1             |              |              |              |
| 1478 | E+ZPE=-2472.890367 |              |              |              |
| 1479 | G=-2472.935441     |              |              |              |

|      |    |              |              |              |
|------|----|--------------|--------------|--------------|
| 1480 | Ni | 2.820951000  | -0.643892000 | -0.340073000 |
| 1481 | Ni | 2.208905000  | 1.079424000  | 1.332777000  |
| 1482 | Ni | -0.083242000 | 0.554177000  | 2.264542000  |
| 1483 | Ni | -0.918497000 | -1.610071000 | 1.037377000  |
| 1484 | Ni | 0.925165000  | -2.268874000 | -0.530637000 |
| 1485 | Ni | 1.184081000  | -0.447954000 | -2.145674000 |
| 1486 | Ni | 1.972144000  | 1.586652000  | -1.058809000 |
| 1487 | Ni | 0.190187000  | 2.300373000  | 0.493953000  |
| 1488 | Ni | -1.697657000 | 0.675525000  | 0.301922000  |
| 1489 | Ni | -1.070299000 | -1.029546000 | -1.377935000 |
| 1490 | Ni | -0.416059000 | 1.347568000  | -1.690023000 |
| 1491 | Ni | 0.539529000  | 0.002574000  | 0.083372000  |
| 1492 | Ni | 1.611535000  | -1.356650000 | 1.710083000  |
| 1493 | C  | -3.832888000 | 1.049601000  | -0.418167000 |
| 1494 | C  | -4.679377000 | -1.085421000 | 0.542286000  |
| 1495 | C  | -5.832168000 | -0.086289000 | 0.332165000  |
| 1496 | C  | -5.122515000 | 1.279957000  | 0.390513000  |
| 1497 | H  | -3.042658000 | 1.839840000  | -0.145753000 |
| 1498 | H  | -3.981559000 | 1.179644000  | -1.503311000 |
| 1499 | H  | -4.865799000 | -2.089723000 | 0.129905000  |
| 1500 | H  | -4.471050000 | -1.196546000 | 1.621332000  |
| 1501 | H  | -6.282721000 | -0.227729000 | -0.667268000 |
| 1502 | H  | -6.637594000 | -0.189847000 | 1.077682000  |
| 1503 | H  | -5.729878000 | 2.108784000  | -0.008935000 |
| 1504 | H  | -4.865773000 | 1.525444000  | 1.437376000  |



|      |                    |              |              |              |
|------|--------------------|--------------|--------------|--------------|
| 1505 | C                  | -3.450923000 | -0.457641000 | -0.192966000 |
| 1506 | O                  | -2.991614000 | -1.148113000 | -1.270344000 |
| 1507 | H                  | 0.398560000  | -2.656874000 | 1.164373000  |
| 1508 | H                  | -2.550218000 | -0.609903000 | 0.869840000  |
| 1509 | c. IM1             |              |              |              |
| 1510 | E+ZPE=-2472.892005 |              |              |              |
| 1511 | G=-2472.939916     |              |              |              |
| 1512 | Ni                 | 2.755282000  | -0.566996000 | -0.812259000 |
| 1513 | Ni                 | 2.460126000  | 1.116234000  | 0.982905000  |
| 1514 | Ni                 | 0.429023000  | 0.510571000  | 2.362919000  |
| 1515 | Ni                 | -0.585260000 | -1.663561000 | 1.297955000  |
| 1516 | Ni                 | 0.906571000  | -2.246624000 | -0.632564000 |
| 1517 | Ni                 | 0.772027000  | -0.399015000 | -2.232325000 |
| 1518 | Ni                 | 1.714368000  | 1.645198000  | -1.296768000 |
| 1519 | Ni                 | 0.277992000  | 2.285266000  | 0.606795000  |
| 1520 | Ni                 | -1.563159000 | 0.604946000  | 0.783166000  |
| 1521 | Ni                 | -1.255167000 | -1.057767000 | -1.021565000 |
| 1522 | Ni                 | -0.745606000 | 1.341332000  | -1.419530000 |
| 1523 | Ni                 | 0.596293000  | 0.003988000  | 0.090342000  |
| 1524 | Ni                 | 2.021619000  | -1.341404000 | 1.431774000  |
| 1525 | C                  | -4.384661000 | 0.834342000  | -0.872307000 |
| 1526 | C                  | -5.120109000 | -1.108689000 | 0.356461000  |
| 1527 | C                  | -5.939229000 | 0.094315000  | 0.892178000  |
| 1528 | C                  | -5.316709000 | 1.368183000  | 0.227058000  |
| 1529 | H                  | -3.559738000 | 1.525603000  | -1.132374000 |

|      |                    |              |              |              |
|------|--------------------|--------------|--------------|--------------|
| 1530 | H                  | -4.941804000 | 0.593597000  | -1.798994000 |
| 1531 | H                  | -5.662730000 | -1.632510000 | -0.453074000 |
| 1532 | H                  | -4.874144000 | -1.858200000 | 1.127522000  |
| 1533 | H                  | -7.006505000 | -0.008926000 | 0.637145000  |
| 1534 | H                  | -5.883655000 | 0.163575000  | 1.991486000  |
| 1535 | H                  | -6.082907000 | 2.063094000  | -0.152987000 |
| 1536 | H                  | -4.714710000 | 1.922860000  | 0.970357000  |
| 1537 | C                  | -3.849951000 | -0.486964000 | -0.273554000 |
| 1538 | O                  | -3.133405000 | -1.322491000 | -1.108281000 |
| 1539 | H                  | 0.722580000  | -2.722579000 | 1.087562000  |
| 1540 | H                  | -3.220252000 | -0.174401000 | 0.666883000  |
| 1541 | d. IM2             |              |              |              |
| 1542 | E+ZPE=-2472.891813 |              |              |              |
| 1543 | G=-2472.940473     |              |              |              |
| 1544 | Ni                 | -2.752375000 | 0.569988000  | -0.824983000 |
| 1545 | Ni                 | -2.470266000 | -1.123132000 | 0.963101000  |
| 1546 | Ni                 | -0.450364000 | -0.523184000 | 2.362658000  |
| 1547 | Ni                 | 0.571216000  | 1.655786000  | 1.319304000  |
| 1548 | Ni                 | -0.908455000 | 2.249476000  | -0.621789000 |
| 1549 | Ni                 | -0.756248000 | 0.411316000  | -2.230344000 |
| 1550 | Ni                 | -1.706417000 | -1.638790000 | -1.313622000 |
| 1551 | Ni                 | -0.284611000 | -2.288440000 | 0.597675000  |
| 1552 | Ni                 | 1.554929000  | -0.608846000 | 0.797279000  |
| 1553 | Ni                 | 1.259451000  | 1.065455000  | -1.000091000 |
| 1554 | Ni                 | 0.754008000  | -1.332741000 | -1.415007000 |

|      |    |                    |              |              |
|------|----|--------------------|--------------|--------------|
| 1555 | Ni | -0.600266000       | -0.005137000 | 0.091209000  |
| 1556 | Ni | -2.037214000       | 1.332326000  | 1.429087000  |
| 1557 | C  | 4.383256000        | -0.824246000 | -0.883213000 |
| 1558 | C  | 5.140739000        | 1.094690000  | 0.367671000  |
| 1559 | C  | 5.966655000        | -0.117978000 | 0.869780000  |
| 1560 | C  | 5.335931000        | -1.379062000 | 0.187878000  |
| 1561 | H  | 3.551702000        | -1.508842000 | -1.141502000 |
| 1562 | H  | 4.921851000        | -0.567680000 | -1.816556000 |
| 1563 | H  | 5.671484000        | 1.631131000  | -0.441541000 |
| 1564 | H  | 4.909406000        | 1.831668000  | 1.155206000  |
| 1565 | H  | 7.030886000        | -0.009447000 | 0.604317000  |
| 1566 | H  | 5.924405000        | -0.208504000 | 1.968161000  |
| 1567 | H  | 6.097489000        | -2.062611000 | -0.221032000 |
| 1568 | H  | 4.749968000        | -1.952572000 | 0.929504000  |
| 1569 | C  | 3.859761000        | 0.485012000  | -0.251071000 |
| 1570 | O  | 3.132390000        | 1.338930000  | -1.060232000 |
| 1571 | H  | -0.130212000       | 3.036721000  | 0.687746000  |
| 1572 | H  | 3.240985000        | 0.154038000  | 0.685961000  |
| 1573 | e. | TS2                |              |              |
| 1574 |    | E+ZPE=-2472.851883 |              |              |
| 1575 |    | G=-2472.899198     |              |              |
| 1576 | Ni | 2.672731000        | -0.594436000 | -1.054575000 |
| 1577 | Ni | 2.644417000        | 0.668931000  | 1.077626000  |
| 1578 | Ni | 0.611143000        | -0.013762000 | 2.419928000  |
| 1579 | Ni | -0.688670000       | -1.777798000 | 0.977463000  |

|      |    |              |              |              |
|------|----|--------------|--------------|--------------|
| 1580 | Ni | 0.653365000  | -2.069746000 | -1.127629000 |
| 1581 | Ni | 0.668184000  | 0.089968000  | -2.275251000 |
| 1582 | Ni | 1.876810000  | 1.766639000  | -0.981389000 |
| 1583 | Ni | 0.600130000  | 2.112881000  | 1.098361000  |
| 1584 | Ni | -1.416903000 | 0.637802000  | 1.031794000  |
| 1585 | Ni | -1.372654000 | -0.604785000 | -1.114396000 |
| 1586 | Ni | -0.604661000 | 1.755357000  | -1.011257000 |
| 1587 | Ni | 0.630958000  | -0.016703000 | 0.086920000  |
| 1588 | Ni | 1.942464000  | -1.767609000 | 1.010301000  |
| 1589 | C  | -4.475430000 | 0.726456000  | -0.920455000 |
| 1590 | C  | -5.351865000 | -1.028398000 | 0.505638000  |
| 1591 | C  | -6.289489000 | 0.205107000  | 0.648188000  |
| 1592 | C  | -5.544463000 | 1.392348000  | -0.041146000 |
| 1593 | H  | -3.613289000 | 1.373410000  | -1.171477000 |
| 1594 | H  | -4.911146000 | 0.344844000  | -1.864417000 |
| 1595 | H  | -5.754541000 | -1.750427000 | -0.227741000 |
| 1596 | H  | -5.197913000 | -1.575341000 | 1.451366000  |
| 1597 | H  | -7.257497000 | 0.013664000  | 0.156736000  |
| 1598 | H  | -6.512535000 | 0.435879000  | 1.702816000  |
| 1599 | H  | -6.225373000 | 2.051666000  | -0.603145000 |
| 1600 | H  | -5.045339000 | 2.017224000  | 0.722540000  |
| 1601 | C  | -4.029327000 | -0.465882000 | -0.058303000 |
| 1602 | O  | -3.223815000 | -1.419388000 | -0.722811000 |
| 1603 | H  | -2.196053000 | -1.724672000 | 0.137556000  |
| 1604 | H  | -3.437106000 | -0.037590000 | 0.813629000  |

|      |                    |              |              |              |
|------|--------------------|--------------|--------------|--------------|
| 1605 | f. CPOL            |              |              |              |
| 1606 | E+ZPE=-2472.856557 |              |              |              |
| 1607 | G=-2472.905324     |              |              |              |
| 1608 | Ni                 | -2.499908000 | 0.804853000  | -1.265029000 |
| 1609 | Ni                 | -2.837811000 | -0.626028000 | 0.730382000  |
| 1610 | Ni                 | -0.984807000 | -0.181158000 | 2.393946000  |
| 1611 | Ni                 | 0.593158000  | 1.610023000  | 1.306975000  |
| 1612 | Ni                 | -0.419466000 | 2.154097000  | -0.928781000 |
| 1613 | Ni                 | -0.378010000 | 0.098021000  | -2.255219000 |
| 1614 | Ni                 | -1.841208000 | -1.598475000 | -1.293095000 |
| 1615 | Ni                 | -0.891427000 | -2.191258000 | 0.907506000  |
| 1616 | Ni                 | 1.185128000  | -0.841636000 | 1.240009000  |
| 1617 | Ni                 | 1.508303000  | 0.570832000  | -0.763821000 |
| 1618 | Ni                 | 0.616681000  | -1.738528000 | -0.980496000 |
| 1619 | Ni                 | -0.672518000 | 0.012229000  | 0.088343000  |
| 1620 | Ni                 | -2.012965000 | 1.759861000  | 0.976548000  |
| 1621 | C                  | 4.557835000  | -0.804396000 | -0.765151000 |
| 1622 | C                  | 5.690480000  | 1.038435000  | 0.312084000  |
| 1623 | C                  | 6.459196000  | -0.231319000 | 0.731465000  |
| 1624 | C                  | 5.853878000  | -1.383224000 | -0.135620000 |
| 1625 | H                  | 3.681770000  | -1.478408000 | -0.722617000 |
| 1626 | H                  | 4.715566000  | -0.531350000 | -1.824625000 |
| 1627 | H                  | 6.104184000  | 1.460617000  | -0.622488000 |
| 1628 | H                  | 5.694649000  | 1.830585000  | 1.079092000  |
| 1629 | H                  | 7.547518000  | -0.125749000 | 0.601071000  |

|      |                                                    |              |              |              |
|------|----------------------------------------------------|--------------|--------------|--------------|
| 1630 | H                                                  | 6.282211000  | -0.432112000 | 1.802391000  |
| 1631 | H                                                  | 6.556439000  | -1.710079000 | -0.918582000 |
| 1632 | H                                                  | 5.638005000  | -2.268007000 | 0.485620000  |
| 1633 | C                                                  | 4.294795000  | 0.482346000  | 0.021235000  |
| 1634 | O                                                  | 3.440658000  | 1.372485000  | -0.759117000 |
| 1635 | H                                                  | 3.138837000  | 2.095556000  | -0.159571000 |
| 1636 | H                                                  | 3.754288000  | 0.248686000  | 0.965098000  |
| 1637 | 8. CPO to CPOL on charged (-1) Ni cluster (path b) |              |              |              |
| 1638 | a. Ni + CPO+2H                                     |              |              |              |
| 1639 | E+ZPE=-2472.936791                                 |              |              |              |
| 1640 | G=-2472.981176                                     |              |              |              |
| 1641 | Ni                                                 | -2.534628000 | -0.468215000 | -1.114953000 |
| 1642 | Ni                                                 | -1.794569000 | -1.823604000 | 0.823444000  |
| 1643 | Ni                                                 | -0.451414000 | -0.362931000 | 2.390712000  |
| 1644 | Ni                                                 | -0.343851000 | 2.019050000  | 1.301713000  |
| 1645 | Ni                                                 | -1.652066000 | 1.856824000  | -0.839505000 |
| 1646 | Ni                                                 | -0.495165000 | 0.240434000  | -2.266022000 |
| 1647 | Ni                                                 | -0.576037000 | -1.999682000 | -1.301243000 |
| 1648 | Ni                                                 | 0.707795000  | -1.912267000 | 0.804869000  |
| 1649 | Ni                                                 | 1.589203000  | 0.409762000  | 1.081628000  |
| 1650 | Ni                                                 | 0.844875000  | 1.744715000  | -0.867540000 |
| 1651 | Ni                                                 | 1.489093000  | -0.643337000 | -1.152658000 |
| 1652 | Ni                                                 | -0.490813000 | -0.007271000 | 0.087842000  |
| 1653 | Ni                                                 | -2.540112000 | 0.580203000  | 1.137741000  |
| 1654 | C                                                  | 3.706211000  | -0.492968000 | -1.179801000 |

|      |                    |              |              |              |
|------|--------------------|--------------|--------------|--------------|
| 1655 | C                  | 3.777081000  | 0.728746000  | 0.991974000  |
| 1656 | C                  | 4.887701000  | -0.341285000 | 0.929005000  |
| 1657 | C                  | 4.396832000  | -1.362146000 | -0.117015000 |
| 1658 | H                  | 3.012722000  | -1.139792000 | -1.854224000 |
| 1659 | H                  | 4.409008000  | -0.063845000 | -1.918214000 |
| 1660 | H                  | 4.135946000  | 1.750005000  | 1.193593000  |
| 1661 | H                  | 3.109023000  | 0.482640000  | 1.918614000  |
| 1662 | H                  | 5.814903000  | 0.139429000  | 0.568548000  |
| 1663 | H                  | 5.108907000  | -0.803037000 | 1.905282000  |
| 1664 | H                  | 5.208506000  | -1.986600000 | -0.523552000 |
| 1665 | H                  | 3.637638000  | -2.028162000 | 0.336037000  |
| 1666 | C                  | 3.062995000  | 0.670955000  | -0.380421000 |
| 1667 | O                  | 2.758471000  | 1.820842000  | -1.021429000 |
| 1668 | H                  | -1.126878000 | 3.026858000  | 0.239516000  |
| 1669 | H                  | 0.572812000  | 1.092906000  | 2.434571000  |
| 1670 | b. TS1             |              |              |              |
| 1671 | E+ZPE=-2472.867411 |              |              |              |
| 1672 | G=-2472.912192     |              |              |              |
| 1673 | Ni                 | -2.476017000 | -0.605269000 | -1.173761000 |
| 1674 | Ni                 | -1.727718000 | -1.872274000 | 0.820749000  |
| 1675 | Ni                 | -0.524612000 | -0.302368000 | 2.396801000  |
| 1676 | Ni                 | -0.515606000 | 2.057480000  | 1.253585000  |
| 1677 | Ni                 | -1.737159000 | 1.772376000  | -0.925001000 |
| 1678 | Ni                 | -0.441212000 | 0.193835000  | -2.272757000 |
| 1679 | Ni                 | -0.429203000 | -2.023605000 | -1.258343000 |

|      |    |                    |              |              |
|------|----|--------------------|--------------|--------------|
| 1680 | Ni | 0.774296000        | -1.816801000 | 0.887861000  |
| 1681 | Ni | 1.510486000        | 0.560907000  | 1.135777000  |
| 1682 | Ni | 0.761762000        | 1.803811000  | -0.867962000 |
| 1683 | Ni | 1.552090000        | -0.552369000 | -1.070579000 |
| 1684 | Ni | -0.504569000       | -0.001232000 | 0.085205000  |
| 1685 | Ni | -2.619416000       | 0.491160000  | 1.051207000  |
| 1686 | C  | 3.761393000        | -0.359066000 | -1.242969000 |
| 1687 | C  | 3.796611000        | 0.591378000  | 1.054218000  |
| 1688 | C  | 4.810041000        | -0.577141000 | 0.951012000  |
| 1689 | C  | 4.396070000        | -1.392438000 | -0.295034000 |
| 1690 | H  | 3.071907000        | -0.870464000 | -2.019928000 |
| 1691 | H  | 4.493615000        | 0.170752000  | -1.881813000 |
| 1692 | H  | 4.280607000        | 1.563868000  | 1.243217000  |
| 1693 | H  | 3.113618000        | 0.429336000  | 1.968928000  |
| 1694 | H  | 5.816338000        | -0.150296000 | 0.797784000  |
| 1695 | H  | 4.853239000        | -1.197712000 | 1.860708000  |
| 1696 | H  | 5.240851000        | -1.934781000 | -0.750103000 |
| 1697 | H  | 3.618794000        | -2.130154000 | -0.020810000 |
| 1698 | C  | 3.060389000        | 0.634083000  | -0.303491000 |
| 1699 | O  | 2.835097000        | 1.937088000  | -0.816343000 |
| 1700 | H  | 1.921318000        | 2.325289000  | 0.121302000  |
| 1701 | H  | 0.514449000        | 1.158335000  | 2.471173000  |
| 1702 | c. | IM1                |              |              |
| 1703 |    | E+ZPE=-2472.881800 |              |              |
| 1704 |    | G=-2472.926366     |              |              |



|      |    |              |              |              |
|------|----|--------------|--------------|--------------|
| 1705 | Ni | -2.520226000 | -0.469877000 | -1.166326000 |
| 1706 | Ni | -1.777731000 | -1.874580000 | 0.735994000  |
| 1707 | Ni | -0.496816000 | -0.438222000 | 2.376727000  |
| 1708 | Ni | -0.432115000 | 1.983327000  | 1.372844000  |
| 1709 | Ni | -1.700849000 | 1.864898000  | -0.794212000 |
| 1710 | Ni | -0.480632000 | 0.328724000  | -2.256768000 |
| 1711 | Ni | -0.522005000 | -1.943787000 | -1.373524000 |
| 1712 | Ni | 0.725552000  | -1.901025000 | 0.757006000  |
| 1713 | Ni | 1.542295000  | 0.433952000  | 1.128302000  |
| 1714 | Ni | 0.798433000  | 1.815155000  | -0.784598000 |
| 1715 | Ni | 1.508692000  | -0.548518000 | -1.139428000 |
| 1716 | Ni | -0.508233000 | -0.002557000 | 0.086673000  |
| 1717 | Ni | -2.588581000 | 0.497801000  | 1.121075000  |
| 1718 | C  | 3.723314000  | -0.380179000 | -1.221557000 |
| 1719 | C  | 3.827393000  | 0.542841000  | 1.077867000  |
| 1720 | C  | 4.853816000  | -0.609606000 | 0.916039000  |
| 1721 | C  | 4.371297000  | -1.426759000 | -0.298895000 |
| 1722 | H  | 3.045002000  | -0.888017000 | -2.010945000 |
| 1723 | H  | 4.456989000  | 0.170477000  | -1.840162000 |
| 1724 | H  | 4.314285000  | 1.511286000  | 1.288506000  |
| 1725 | H  | 3.170808000  | 0.348363000  | 1.997453000  |
| 1726 | H  | 5.842318000  | -0.168679000 | 0.700013000  |
| 1727 | H  | 4.957185000  | -1.222954000 | 1.825579000  |
| 1728 | H  | 5.181724000  | -1.988682000 | -0.790769000 |
| 1729 | H  | 3.588514000  | -2.144050000 | 0.012211000  |

|      |                    |              |              |              |
|------|--------------------|--------------|--------------|--------------|
| 1730 | C                  | 3.032023000  | 0.593538000  | -0.251259000 |
| 1731 | O                  | 2.956604000  | 1.954123000  | -0.839873000 |
| 1732 | H                  | 2.996835000  | 2.578167000  | -0.082136000 |
| 1733 | H                  | 0.608511000  | 0.983962000  | 2.500641000  |
| 1734 | d. IM2             |              |              |              |
| 1735 | E+ZPE=-2472.869646 |              |              |              |
| 1736 | G=-2472.915509     |              |              |              |
| 1737 | Ni                 | -2.837679000 | 0.280251000  | -0.560853000 |
| 1738 | Ni                 | -2.087361000 | -1.571080000 | 0.906514000  |
| 1739 | Ni                 | -0.063402000 | -0.816431000 | 2.224143000  |
| 1740 | Ni                 | 0.459015000  | 1.639633000  | 1.466876000  |
| 1741 | Ni                 | -1.295770000 | 2.222967000  | -0.235510000 |
| 1742 | Ni                 | -1.001877000 | 0.693385000  | -2.122892000 |
| 1743 | Ni                 | -1.488699000 | -1.605830000 | -1.475089000 |
| 1744 | Ni                 | 0.214253000  | -2.250213000 | 0.192437000  |
| 1745 | Ni                 | 1.752020000  | -0.313406000 | 0.514881000  |
| 1746 | Ni                 | 0.990576000  | 1.526869000  | -0.964275000 |
| 1747 | Ni                 | 0.859935000  | -0.841000000 | -1.716004000 |
| 1748 | Ni                 | -0.535172000 | -0.007556000 | 0.084177000  |
| 1749 | Ni                 | -2.031324000 | 0.829001000  | 1.724340000  |
| 1750 | C                  | 4.095738000  | -0.208770000 | -1.213894000 |
| 1751 | C                  | 4.488963000  | 0.640272000  | 0.980431000  |
| 1752 | C                  | 5.103634000  | -0.785828000 | 0.957448000  |
| 1753 | C                  | 4.720161000  | -1.383453000 | -0.437125000 |
| 1754 | H                  | 3.400412000  | -0.530265000 | -2.014305000 |

|      |    |                    |              |              |
|------|----|--------------------|--------------|--------------|
| 1755 | H  | 4.887830000        | 0.417326000  | -1.685470000 |
| 1756 | H  | 5.257090000        | 1.392727000  | 0.687729000  |
| 1757 | H  | 4.099379000        | 0.930833000  | 1.971328000  |
| 1758 | H  | 6.196029000        | -0.749813000 | 1.102647000  |
| 1759 | H  | 4.688999000        | -1.405902000 | 1.769837000  |
| 1760 | H  | 5.580489000        | -1.832946000 | -0.960386000 |
| 1761 | H  | 3.950795000        | -2.167344000 | -0.309573000 |
| 1762 | C  | 3.403535000        | 0.574986000  | -0.100608000 |
| 1763 | O  | 3.068330000        | 1.941949000  | -0.625101000 |
| 1764 | H  | 2.825522000        | 2.461773000  | 0.175072000  |
| 1765 | H  | 1.528209000        | -1.099702000 | 2.061509000  |
| 1766 | e. | TS2                |              |              |
| 1767 |    | E+ZPE=-2472.843826 |              |              |
| 1768 |    | G=-2472.889929     |              |              |
| 1769 | Ni | -2.873121000       | 0.098833000  | -0.606354000 |
| 1770 | Ni | -2.079205000       | -1.426756000 | 1.178511000  |
| 1771 | Ni | -0.090920000       | -0.379311000 | 2.340772000  |
| 1772 | Ni | 0.362558000        | 1.911367000  | 1.146511000  |
| 1773 | Ni | -1.394336000       | 2.116283000  | -0.639112000 |
| 1774 | Ni | -1.037377000       | 0.276165000  | -2.212308000 |
| 1775 | Ni | -1.459040000       | -1.879327000 | -1.154366000 |
| 1776 | Ni | 0.248215000        | -2.152078000 | 0.608083000  |
| 1777 | Ni | 1.723361000        | -0.140977000 | 0.573911000  |
| 1778 | Ni | 0.918378000        | 1.370687000  | -1.221114000 |
| 1779 | Ni | 0.866987000        | -1.097501000 | -1.524939000 |

|      |                    |              |              |              |
|------|--------------------|--------------|--------------|--------------|
| 1780 | Ni                 | -0.568554000 | 0.007505000  | 0.087197000  |
| 1781 | Ni                 | -2.103852000 | 1.083249000  | 1.541402000  |
| 1782 | C                  | 4.065765000  | -0.535012000 | -1.059101000 |
| 1783 | C                  | 4.895047000  | 0.877864000  | 0.680494000  |
| 1784 | C                  | 5.579410000  | -0.491555000 | 0.899933000  |
| 1785 | C                  | 5.030819000  | -1.416132000 | -0.238109000 |
| 1786 | H                  | 3.238374000  | -1.111684000 | -1.522559000 |
| 1787 | H                  | 4.599779000  | -0.002858000 | -1.872345000 |
| 1788 | H                  | 5.496005000  | 1.510268000  | -0.001040000 |
| 1789 | H                  | 4.727404000  | 1.443750000  | 1.612544000  |
| 1790 | H                  | 6.676607000  | -0.399945000 | 0.875884000  |
| 1791 | H                  | 5.311319000  | -0.901992000 | 1.888140000  |
| 1792 | H                  | 5.834096000  | -1.833014000 | -0.865746000 |
| 1793 | H                  | 4.476123000  | -2.266284000 | 0.195134000  |
| 1794 | C                  | 3.585914000  | 0.514102000  | -0.050142000 |
| 1795 | O                  | 3.060232000  | 1.698974000  | -0.765886000 |
| 1796 | H                  | 2.770003000  | 2.323831000  | -0.057078000 |
| 1797 | H                  | 3.080058000  | -0.117420000 | 1.166335000  |
| 1798 | f. CPOL            |              |              |              |
| 1799 | E+ZPE=-2472.856557 |              |              |              |
| 1800 | G=-2472.905324     |              |              |              |
| 1801 | Ni                 | -2.499908000 | 0.804853000  | -1.265029000 |
| 1802 | Ni                 | -2.837811000 | -0.626028000 | 0.730382000  |
| 1803 | Ni                 | -0.984807000 | -0.181158000 | 2.393946000  |
| 1804 | Ni                 | 0.593158000  | 1.610023000  | 1.306975000  |

|      |    |              |              |              |
|------|----|--------------|--------------|--------------|
| 1805 | Ni | -0.419466000 | 2.154097000  | -0.928781000 |
| 1806 | Ni | -0.378010000 | 0.098021000  | -2.255219000 |
| 1807 | Ni | -1.841208000 | -1.598475000 | -1.293095000 |
| 1808 | Ni | -0.891427000 | -2.191258000 | 0.907506000  |
| 1809 | Ni | 1.185128000  | -0.841636000 | 1.240009000  |
| 1810 | Ni | 1.508303000  | 0.570832000  | -0.763821000 |
| 1811 | Ni | 0.616681000  | -1.738528000 | -0.980496000 |
| 1812 | Ni | -0.672518000 | 0.012229000  | 0.088343000  |
| 1813 | Ni | -2.012965000 | 1.759861000  | 0.976548000  |
| 1814 | C  | 4.557835000  | -0.804396000 | -0.765151000 |
| 1815 | C  | 5.690480000  | 1.038435000  | 0.312084000  |
| 1816 | C  | 6.459196000  | -0.231319000 | 0.731465000  |
| 1817 | C  | 5.853878000  | -1.383224000 | -0.135620000 |
| 1818 | H  | 3.681770000  | -1.478408000 | -0.722617000 |
| 1819 | H  | 4.715566000  | -0.531350000 | -1.824625000 |
| 1820 | H  | 6.104184000  | 1.460617000  | -0.622488000 |
| 1821 | H  | 5.694649000  | 1.830585000  | 1.079092000  |
| 1822 | H  | 7.547518000  | -0.125749000 | 0.601071000  |
| 1823 | H  | 6.282211000  | -0.432112000 | 1.802391000  |
| 1824 | H  | 6.556439000  | -1.710079000 | -0.918582000 |
| 1825 | H  | 5.638005000  | -2.268007000 | 0.485620000  |
| 1826 | C  | 4.294795000  | 0.482346000  | 0.021235000  |
| 1827 | O  | 3.440658000  | 1.372485000  | -0.759117000 |
| 1828 | H  | 3.138837000  | 2.095556000  | -0.159571000 |
| 1829 | H  | 3.754288000  | 0.248686000  | 0.965098000  |

1830 9. FAL to FOL on neutral relaxed Ni cluster (path a)

1831 a. Ni + FAL+2H

1832 E+ZPE= -2545.614129

1833 G= -2545.677402

|      |    |              |              |              |
|------|----|--------------|--------------|--------------|
| 1834 | Ni | 1.386831000  | -0.962963000 | 1.173483000  |
| 1835 | Ni | -0.874489000 | -0.999639000 | 2.131340000  |
| 1836 | Ni | -2.650299000 | -1.070397000 | 0.145581000  |
| 1837 | Ni | -1.132338000 | -1.234024000 | -1.966784000 |
| 1838 | Ni | 1.236284000  | -1.266760000 | -1.270262000 |
| 1839 | Ni | 1.636333000  | 1.389175000  | -0.069900000 |
| 1840 | Ni | 0.134992000  | 1.238200000  | 1.864528000  |
| 1841 | Ni | -2.228561000 | 1.037671000  | 1.338460000  |
| 1842 | Ni | -2.225132000 | 0.862153000  | -1.260402000 |
| 1843 | Ni | 0.135346000  | 0.872953000  | -2.095371000 |
| 1844 | Ni | -0.578642000 | 2.425498000  | -0.199102000 |
| 1845 | Ni | -0.459955000 | -0.013744000 | -0.035707000 |
| 1846 | Ni | -0.433238000 | -2.365692000 | 0.206041000  |
| 1847 | C  | 3.120590000  | -1.685944000 | -0.802430000 |
| 1848 | C  | 3.123079000  | -1.993445000 | 0.623274000  |
| 1849 | C  | 3.414192000  | -0.773958000 | 1.324519000  |
| 1850 | C  | 3.581601000  | 0.234546000  | 0.306794000  |
| 1851 | O  | 3.639477000  | -0.351598000 | -0.946923000 |
| 1852 | H  | 3.531108000  | -2.365004000 | -1.563701000 |
| 1853 | H  | 3.142919000  | -3.007764000 | 1.024511000  |
| 1854 | H  | 3.680693000  | -0.643598000 | 2.375335000  |

|      |        |              |              |              |
|------|--------|--------------|--------------|--------------|
| 1855 | C      | 3.533252000  | 1.673412000  | 0.403041000  |
| 1856 | H      | 3.741142000  | 2.118103000  | 1.396627000  |
| 1857 | O      | 3.347100000  | 2.423132000  | -0.657595000 |
| 1858 | H      | -0.970785000 | 2.257802000  | -1.812993000 |
| 1859 | H      | -0.173670000 | 2.792485000  | 1.351790000  |
| 1860 | b. TS1 |              |              |              |
| 1861 | E+ZPE= | -2545.565194 |              |              |
| 1862 | G=     | -2545.629545 |              |              |
| 1863 | Ni     | 1.393277000  | -1.099247000 | 1.011299000  |
| 1864 | Ni     | -0.899897000 | -1.212141000 | 2.015948000  |
| 1865 | Ni     | -2.568423000 | -1.169018000 | 0.025168000  |
| 1866 | Ni     | -1.156854000 | -0.954665000 | -2.068485000 |
| 1867 | Ni     | 1.247408000  | -1.088041000 | -1.432115000 |
| 1868 | Ni     | 1.577595000  | 1.434236000  | 0.073955000  |
| 1869 | Ni     | 0.175390000  | 0.979887000  | 2.027796000  |
| 1870 | Ni     | -2.163194000 | 0.837688000  | 1.446251000  |
| 1871 | Ni     | -2.310528000 | 0.984020000  | -1.096704000 |
| 1872 | Ni     | 0.075465000  | 1.231011000  | -1.979111000 |
| 1873 | Ni     | -0.680490000 | 2.372785000  | 0.137221000  |
| 1874 | Ni     | -0.422406000 | 0.031734000  | -0.061707000 |
| 1875 | Ni     | -0.449352000 | -2.323620000 | -0.076493000 |
| 1876 | C      | 3.109624000  | -1.679028000 | -0.929707000 |
| 1877 | C      | 3.118899000  | -2.084155000 | 0.469894000  |
| 1878 | C      | 3.422186000  | -0.910121000 | 1.252587000  |
| 1879 | C      | 3.575560000  | 0.160339000  | 0.317033000  |

|      |        |              |              |              |
|------|--------|--------------|--------------|--------------|
| 1880 | O      | 3.606322000  | -0.320373000 | -0.968652000 |
| 1881 | H      | 3.546386000  | -2.287288000 | -1.734264000 |
| 1882 | H      | 3.159746000  | -3.123533000 | 0.800973000  |
| 1883 | H      | 3.655559000  | -0.847684000 | 2.317143000  |
| 1884 | C      | 3.566438000  | 1.650944000  | 0.487381000  |
| 1885 | H      | 4.236994000  | 2.012967000  | 1.300433000  |
| 1886 | O      | 3.436693000  | 2.378250000  | -0.619734000 |
| 1887 | H      | -1.032653000 | 2.419127000  | -1.566146000 |
| 1888 | H      | 2.429868000  | 1.845932000  | 1.361169000  |
| 1889 | c. IM1 |              |              |              |
| 1890 | E+ZPE= | -2545.592108 |              |              |
| 1891 | G=     | -2545.657251 |              |              |
| 1892 | Ni     | 1.497630000  | -0.814391000 | 1.108393000  |
| 1893 | Ni     | -0.763126000 | -0.819081000 | 2.247030000  |
| 1894 | Ni     | -2.539678000 | -1.193592000 | 0.377470000  |
| 1895 | Ni     | -1.271979000 | -1.381168000 | -1.788246000 |
| 1896 | Ni     | 1.184115000  | -1.220051000 | -1.281402000 |
| 1897 | Ni     | 1.515988000  | 1.417729000  | -0.312396000 |
| 1898 | Ni     | 0.232647000  | 1.385112000  | 1.768415000  |
| 1899 | Ni     | -2.173496000 | 1.137201000  | 1.366225000  |
| 1900 | Ni     | -2.427109000 | 0.696004000  | -1.192033000 |
| 1901 | Ni     | -0.120455000 | 0.788454000  | -2.189698000 |
| 1902 | Ni     | -0.744448000 | 2.331316000  | -0.330827000 |
| 1903 | Ni     | -0.459012000 | 0.019968000  | -0.021336000 |
| 1904 | Ni     | -0.386394000 | -2.270148000 | 0.360610000  |



|      |        |              |              |              |
|------|--------|--------------|--------------|--------------|
| 1905 | C      | 3.065701000  | -1.737511000 | -0.849971000 |
| 1906 | C      | 3.077852000  | -1.985280000 | 0.589318000  |
| 1907 | C      | 3.589316000  | -0.774203000 | 1.203540000  |
| 1908 | C      | 3.894585000  | 0.117198000  | 0.153968000  |
| 1909 | O      | 3.745946000  | -0.488474000 | -1.062222000 |
| 1910 | H      | 3.362439000  | -2.488464000 | -1.598089000 |
| 1911 | H      | 3.041042000  | -2.983235000 | 1.031031000  |
| 1912 | H      | 3.848772000  | -0.602553000 | 2.250308000  |
| 1913 | C      | 4.225013000  | 1.583040000  | 0.137473000  |
| 1914 | H      | 5.103477000  | 1.743147000  | -0.527460000 |
| 1915 | O      | 3.130218000  | 2.370622000  | -0.301590000 |
| 1916 | H      | -1.273146000 | 2.031325000  | -1.960459000 |
| 1917 | H      | 4.542158000  | 1.857301000  | 1.167466000  |
| 1918 | d. IM2 |              |              |              |
| 1919 | E+ZPE= | -2545.593656 |              |              |
| 1920 | G=     | -2545.658277 |              |              |
| 1921 | Ni     | 1.562147000  | -0.688721000 | 1.007277000  |
| 1922 | Ni     | -0.752653000 | -0.903619000 | 2.194857000  |
| 1923 | Ni     | -2.448025000 | -1.330439000 | 0.481651000  |
| 1924 | Ni     | -1.260071000 | -1.305361000 | -1.825280000 |
| 1925 | Ni     | 1.192413000  | -1.080514000 | -1.395280000 |
| 1926 | Ni     | 1.455142000  | 1.537208000  | -0.249124000 |
| 1927 | Ni     | 0.240114000  | 1.323131000  | 1.813666000  |
| 1928 | Ni     | -2.188049000 | 0.977398000  | 1.353846000  |
| 1929 | Ni     | -2.535886000 | 0.661324000  | -1.066089000 |

|      |    |              |              |              |
|------|----|--------------|--------------|--------------|
| 1930 | Ni | -0.156741000 | 0.928962000  | -2.160942000 |
| 1931 | Ni | -0.893120000 | 2.309765000  | -0.283105000 |
| 1932 | Ni | -0.463056000 | 0.000468000  | -0.008079000 |
| 1933 | Ni | -0.234696000 | -2.293471000 | 0.180379000  |
| 1934 | C  | 3.048895000  | -1.689948000 | -0.917545000 |
| 1935 | C  | 3.033562000  | -2.034957000 | 0.499924000  |
| 1936 | C  | 3.597870000  | -0.906965000 | 1.209464000  |
| 1937 | C  | 3.921775000  | 0.054961000  | 0.227320000  |
| 1938 | O  | 3.776595000  | -0.454276000 | -1.031432000 |
| 1939 | H  | 3.329701000  | -2.399840000 | -1.711004000 |
| 1940 | H  | 2.901201000  | -3.051041000 | 0.874265000  |
| 1941 | H  | 3.855479000  | -0.830381000 | 2.267674000  |
| 1942 | C  | 4.223208000  | 1.523390000  | 0.314360000  |
| 1943 | H  | 5.156456000  | 1.737868000  | -0.253059000 |
| 1944 | O  | 3.159483000  | 2.303038000  | -0.199619000 |
| 1945 | H  | -0.606866000 | 2.514449000  | -1.939751000 |
| 1946 | H  | 4.433011000  | 1.748279000  | 1.383384000  |
| 1947 | e. | TS2          |              |              |
| 1948 |    | E+ZPE=       | -2545.555410 |              |
| 1949 |    | G=           | -2545.620061 |              |
| 1950 | Ni | -1.045430000 | -1.496577000 | -1.091655000 |
| 1951 | Ni | 1.455077000  | -1.417265000 | -1.632940000 |
| 1952 | Ni | 2.699510000  | -0.730748000 | 0.488588000  |
| 1953 | Ni | 1.035774000  | -0.453490000 | 2.227789000  |
| 1954 | Ni | -1.227007000 | -1.139089000 | 1.300230000  |

|      |        |              |              |              |
|------|--------|--------------|--------------|--------------|
| 1955 | Ni     | -1.771648000 | 0.850910000  | -0.537024000 |
| 1956 | Ni     | 0.065545000  | 0.524481000  | -2.254000000 |
| 1957 | Ni     | 2.240302000  | 0.936297000  | -1.303871000 |
| 1958 | Ni     | 1.922400000  | 1.574048000  | 1.178941000  |
| 1959 | Ni     | -0.565100000 | 1.401233000  | 1.560576000  |
| 1960 | Ni     | 0.325988000  | 2.304945000  | -0.514755000 |
| 1961 | Ni     | 0.475602000  | -0.017276000 | -0.011700000 |
| 1962 | Ni     | 0.753297000  | -2.300857000 | 0.527930000  |
| 1963 | C      | -2.977791000 | -1.861596000 | 0.730215000  |
| 1964 | C      | -2.956123000 | -1.911606000 | -0.735217000 |
| 1965 | C      | -3.378208000 | -0.589544000 | -1.185341000 |
| 1966 | C      | -3.671642000 | 0.174228000  | -0.020981000 |
| 1967 | O      | -3.639211000 | -0.636094000 | 1.114500000  |
| 1968 | H      | -3.305581000 | -2.703910000 | 1.354137000  |
| 1969 | H      | -3.106481000 | -2.837080000 | -1.307954000 |
| 1970 | H      | -3.655575000 | -0.313069000 | -2.203045000 |
| 1971 | C      | -4.167343000 | 1.587988000  | 0.159526000  |
| 1972 | H      | -4.632538000 | 1.672731000  | 1.163313000  |
| 1973 | O      | -3.069997000 | 2.495076000  | -0.014135000 |
| 1974 | H      | -1.974882000 | 2.065194000  | 0.827981000  |
| 1975 | H      | -4.945308000 | 1.822291000  | -0.593624000 |
| 1976 | f. FOL |              |              |              |
| 1977 | E+ZPE= | -2545.577764 |              |              |
| 1978 | G=     | -2545.642560 |              |              |
| 1979 | Ni     | 0.749962000  | -1.645203000 | 1.133498000  |

|      |    |              |              |              |
|------|----|--------------|--------------|--------------|
| 1980 | Ni | -1.691897000 | -1.197428000 | 1.612748000  |
| 1981 | Ni | -2.825117000 | -0.422693000 | -0.545551000 |
| 1982 | Ni | -0.923915000 | -0.444160000 | -2.315508000 |
| 1983 | Ni | 1.123444000  | -1.347975000 | -1.206143000 |
| 1984 | Ni | 1.758002000  | 0.572387000  | 0.657948000  |
| 1985 | Ni | -0.153062000 | 0.551632000  | 2.243704000  |
| 1986 | Ni | -2.244734000 | 1.261431000  | 1.167526000  |
| 1987 | Ni | -1.697438000 | 1.636868000  | -1.208130000 |
| 1988 | Ni | 0.789639000  | 1.189014000  | -1.604855000 |
| 1989 | Ni | 0.035327000  | 2.266814000  | 0.519897000  |
| 1990 | Ni | -0.489003000 | 0.051603000  | -0.059981000 |
| 1991 | Ni | -1.085939000 | -2.204086000 | -0.463517000 |
| 1992 | C  | 2.913082000  | -1.914075000 | -0.627650000 |
| 1993 | C  | 2.726019000  | -1.967350000 | 0.827751000  |
| 1994 | C  | 3.232105000  | -0.685734000 | 1.334552000  |
| 1995 | C  | 3.678488000  | 0.069998000  | 0.200862000  |
| 1996 | O  | 3.694867000  | -0.757172000 | -0.943571000 |
| 1997 | H  | 3.229610000  | -2.782277000 | -1.224764000 |
| 1998 | H  | 2.780331000  | -2.911786000 | 1.393210000  |
| 1999 | H  | 3.485761000  | -0.476672000 | 2.376167000  |
| 2000 | C  | 4.544606000  | 1.290653000  | 0.137191000  |
| 2001 | H  | 5.499666000  | 1.069470000  | -0.374014000 |
| 2002 | O  | 3.934566000  | 2.376787000  | -0.592135000 |
| 2003 | H  | 2.959756000  | 2.286287000  | -0.387067000 |
| 2004 | H  | 4.776075000  | 1.587371000  | 1.180064000  |
